# Supplementary material for: 3D reconstruction of skin and spatial mapping of immune cell density, vascular distance and effects of sun exposure and aging
Source: PubMed Central journal article supplement (PMC10356782; doi:10.1038/s42003-023-04991-z), 2023-07-19
Supplement: 42003_2023_4991_MOESM2_ESM.pdf [file 42003_2023_4991_MOESM2_ESM.pdf]

# Supplementary Figures and Tables

Ghose, Ju *et al.* 3D reconstruction of skin and spatial mapping of immune cell density, vascular distance and effects of sun exposure and aging

---

**Supplementary Figure 1** - Layout of samples in each tissue section on a representation of a glass slide (shown as virtual H&E images). Samples ranged in size between 2 mm – 7 mm (region 8 highlighted for reference)

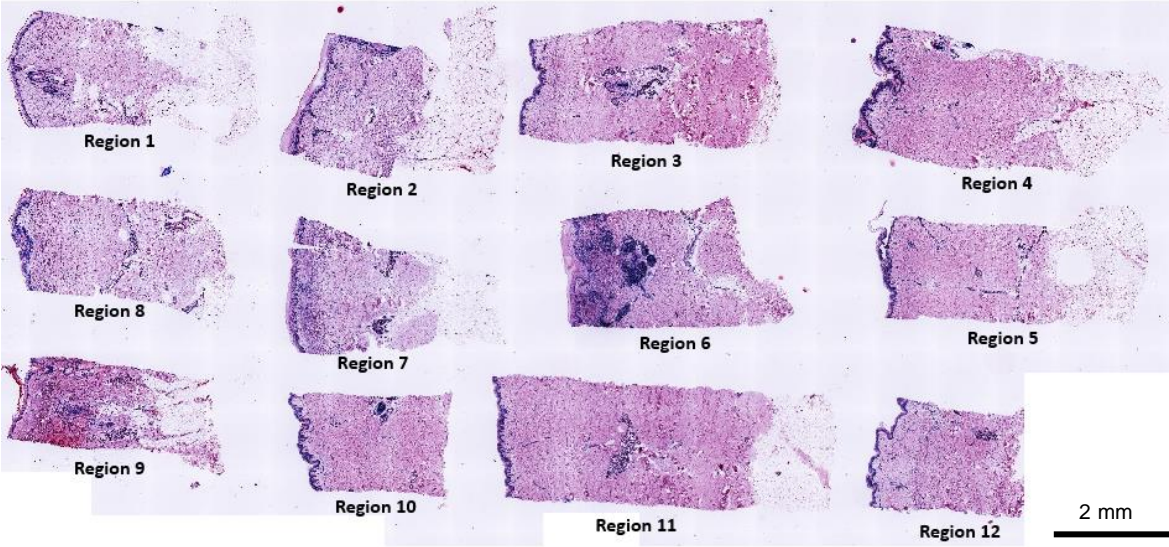

**Supplementary Figure 2** - Anatomical locations for the skin biopsy for females and males on the HuBMAP portal Exploration User Interface - [HuBMAP CCF Exploration User Interface \(CCF-EUI\) \(hubmapconsortium.org\)](https://hubmapconsortium.org)

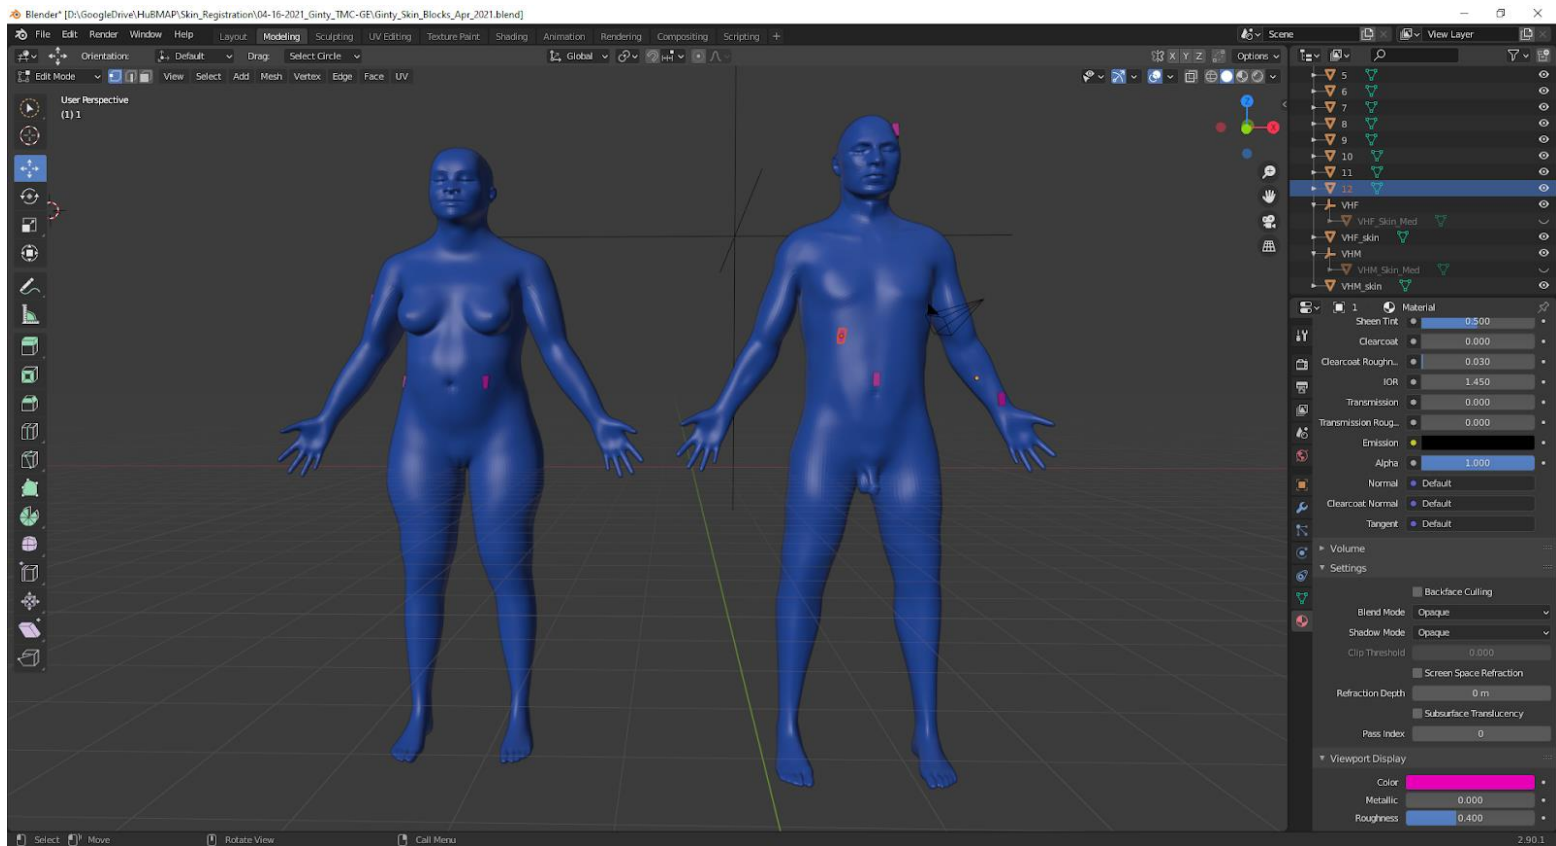

**Supplementary Figure 3 - A subset of the skin anatomical structures, cell types and biomarkers (ASCT+B) captured from the reporting tool.** Anatomical structures are shown as red circles, unique cell types in blue, and protein biomarkers in green. Interactive visualization of all cell types and markers for all organs is available at [ASCT+B Reporter \(hubmapconsortium.github.io\)](https://hubmapconsortium.github.io) and specifically for skin at [ASCT+B Skin Report](#).

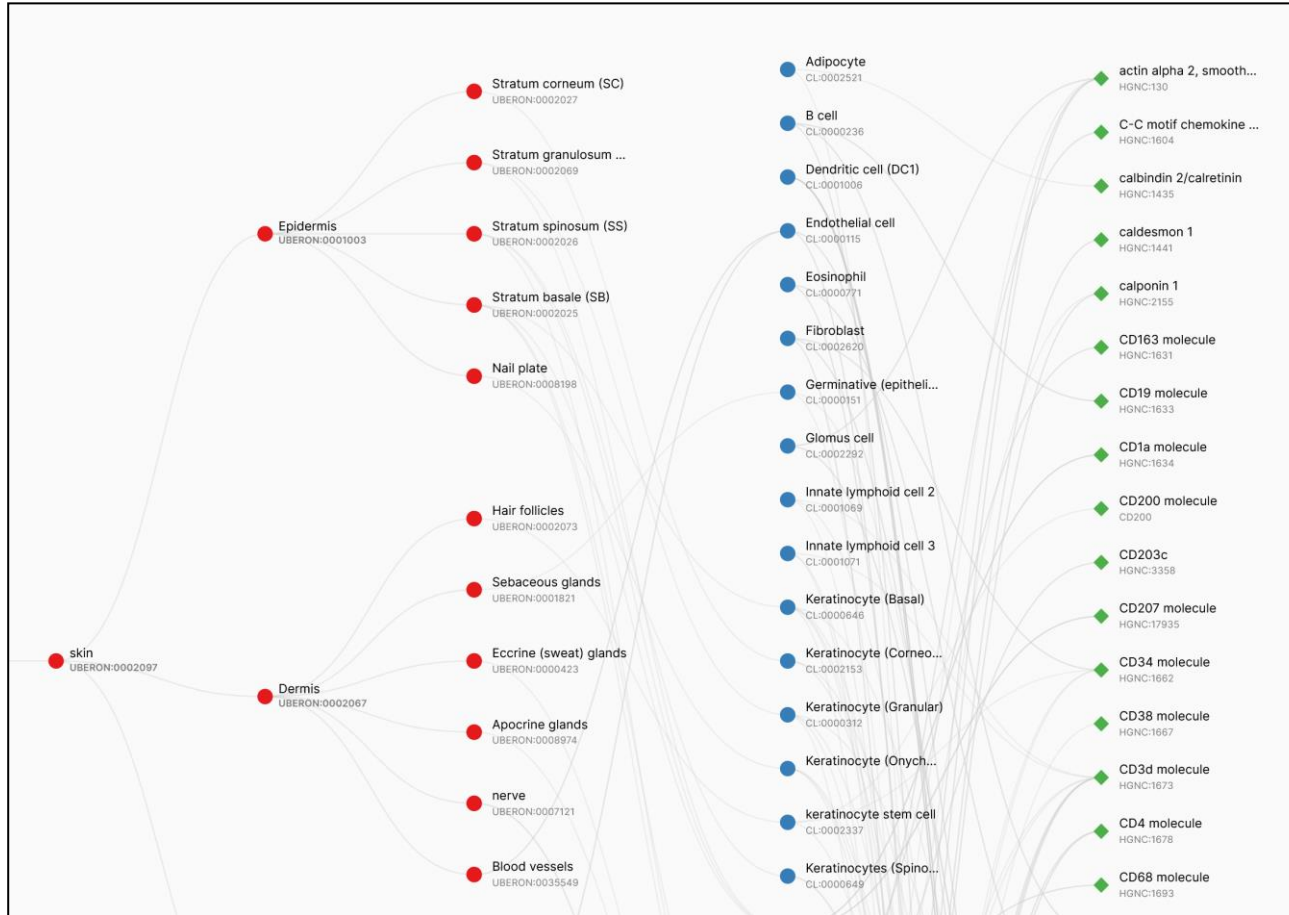

**Supplementary Figure 4 – Micro CT imaging workflow.** a) Samples were embedded in a single paraffin block, which then underwent micro CT imaging prior to block sectioning; b) shows an example section with AF images; c) the same section but shown as a virtual H&E and each sample is annotated as region 1, 2, etc.; d-e) zoomed in example of the Micro CT slice for region 6; f) Corresponding virtual H&E section for region 6.

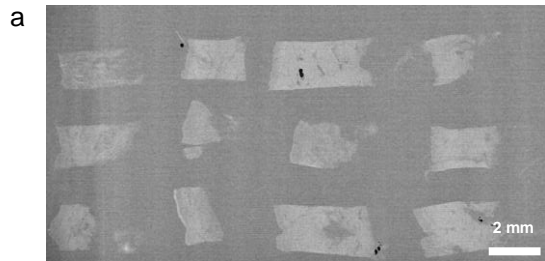

Micro CT image of all samples in the block

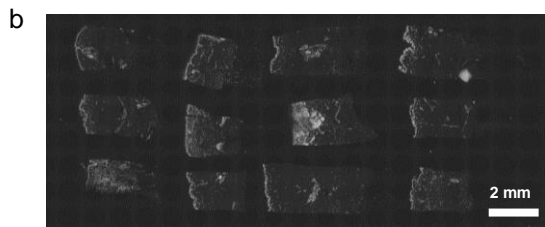

AF image of all tissues in one serial section

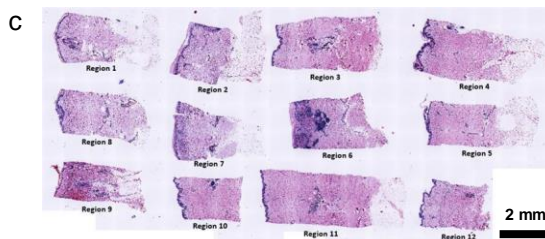

Virtual H&E images of all tissues in one serial section

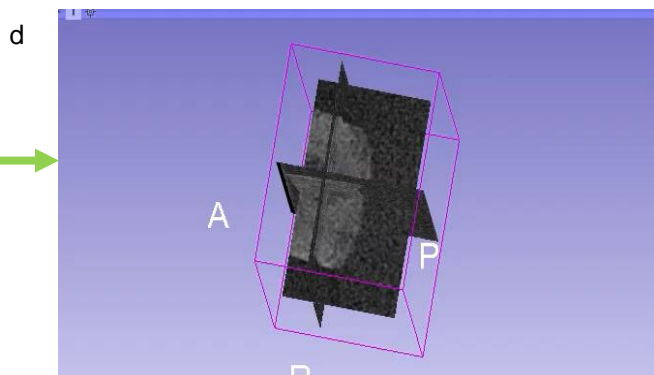

3D micro CT image of region 6

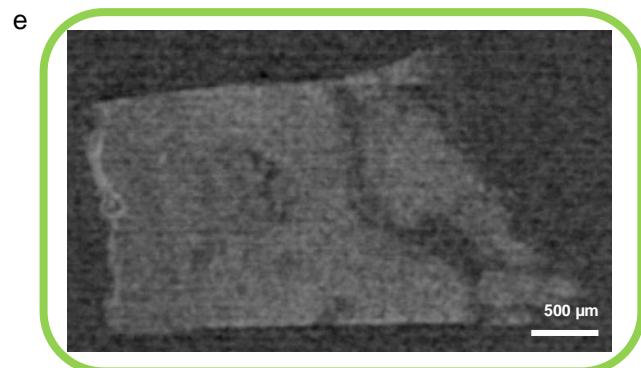

Zoomed micro CT image of region 6

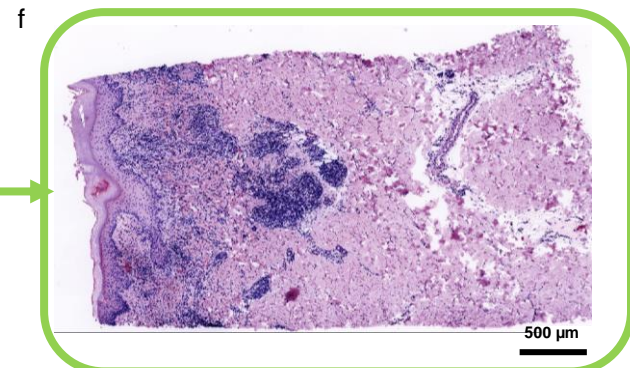

Virtual H&E of region 6 after sectioning

**Supplementary Figure 5 - Cell segmentation using an encoder-decoder based deep learning (DL) model:** A hybrid supervised and unsupervised model where a supervised DL model was used for DAPI/nuclei segmentation. First, an encoder-decoder based deep learning (DL) model was trained on a small sample (194 DAPI image patches selected from 30 images from 10 patients) of manually annotated nuclei created using the annotation function in QuPATH. Multiscale Laplacian of Gaussian (LOG) was introduced along with the DAPI images as separate channels to our encoder-decoder based DL model. The LOG feature detects blob like structures (which correspond to nuclei shape and boundary) in the DAPI images, and thereby provides contextual information to the DL model. Use of multiple channels allowed us to train an accurate DL model from a small sample of the manually annotated DAPI images. The depth of the encoder-decoder DL model was set to 4 and binary cross entropy was used as a loss function.

**a** Whole slide DAPI broken into smaller patches for nuclei segmentation

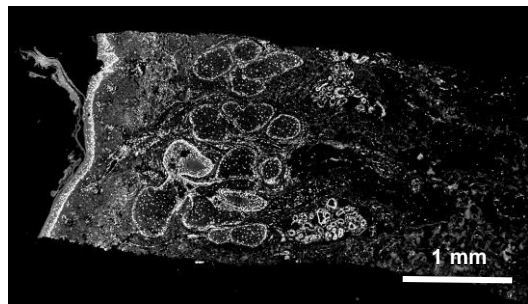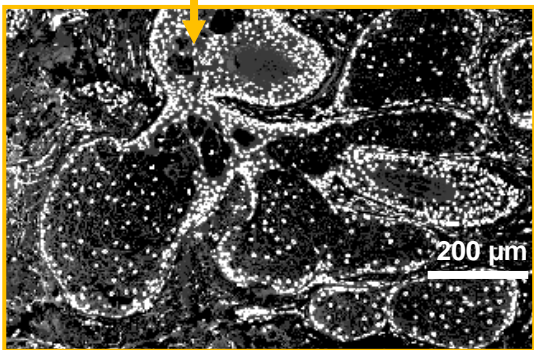

Input DAPI/Nuclei patch

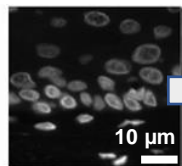

Multiscale LOG Deep Learning Model

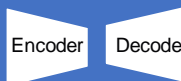

Multiscale Contracting & Expansive Paths

Predicted Nuclei

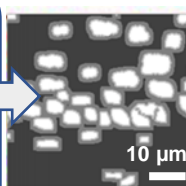

Predicted patches stitched for whole slide nuclei segmentation output

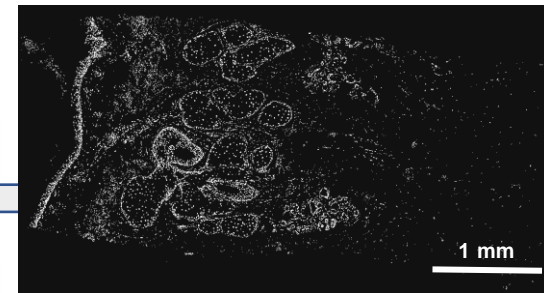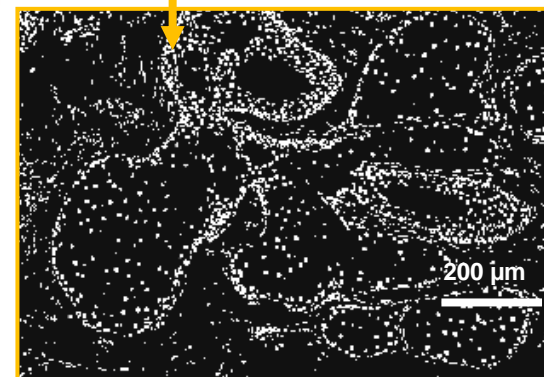

**Supplementary Figure 5 - Supervised Cell Segmentation and Classification Model.** An unsupervised GMM was used for automatic probabilistic segmentation of immune cell types: T killer (CD8), T reg (FOXP3), T helper (CD4), macrophages (CD68), as well as endothelial cells (CD31), markers of proliferation (Ki67), DNA damage (p53), and DNA repair (DDB2). GMM with two clusters was used to obtain a probabilistic segmentation of the cell-type and functional markers and background. Pixels with high signal for cell type and functional markers were automatically assigned high probability values in one cluster (positive class) and pixels with low signal intensity were assigned high probability values in the second cluster (background – negative class). Union of probabilities obtained from the positive class of GMM model and nuclei segmentation (from the DL model) were then fused. Probability values were used to automatically scale (between 0-1) and quantify positive cells (i.e., for each marker of interest) and determine the percentage overlap between the markers and the segmented nuclei. Low percentage overlap was further used to remove imaging artifacts, debris, and cells with low/background marker intensity.

b

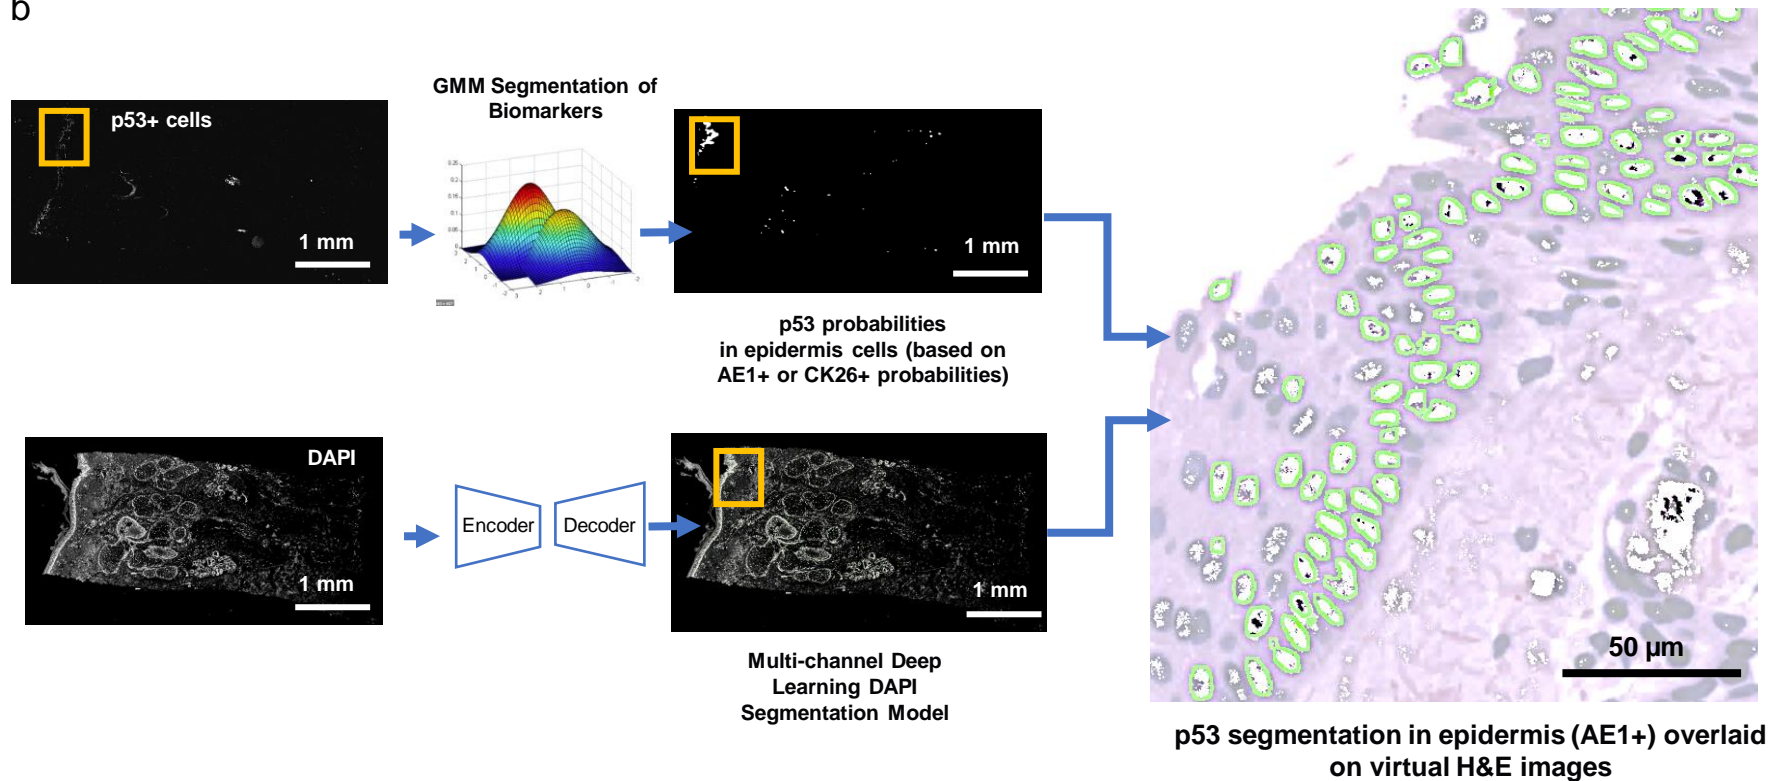

**Supplementary Figure 6** - Normalized 3D immune cell counts analyzed by age and sun exposure in the entire sample (dermis and epidermis) (a-g) and correlations (h); There was a non-significant trend for a positive relationship between T Helper/T Killer cell counts and age ( $p=0.01$ , adj.  $p=0.07$ ) (see panel h).

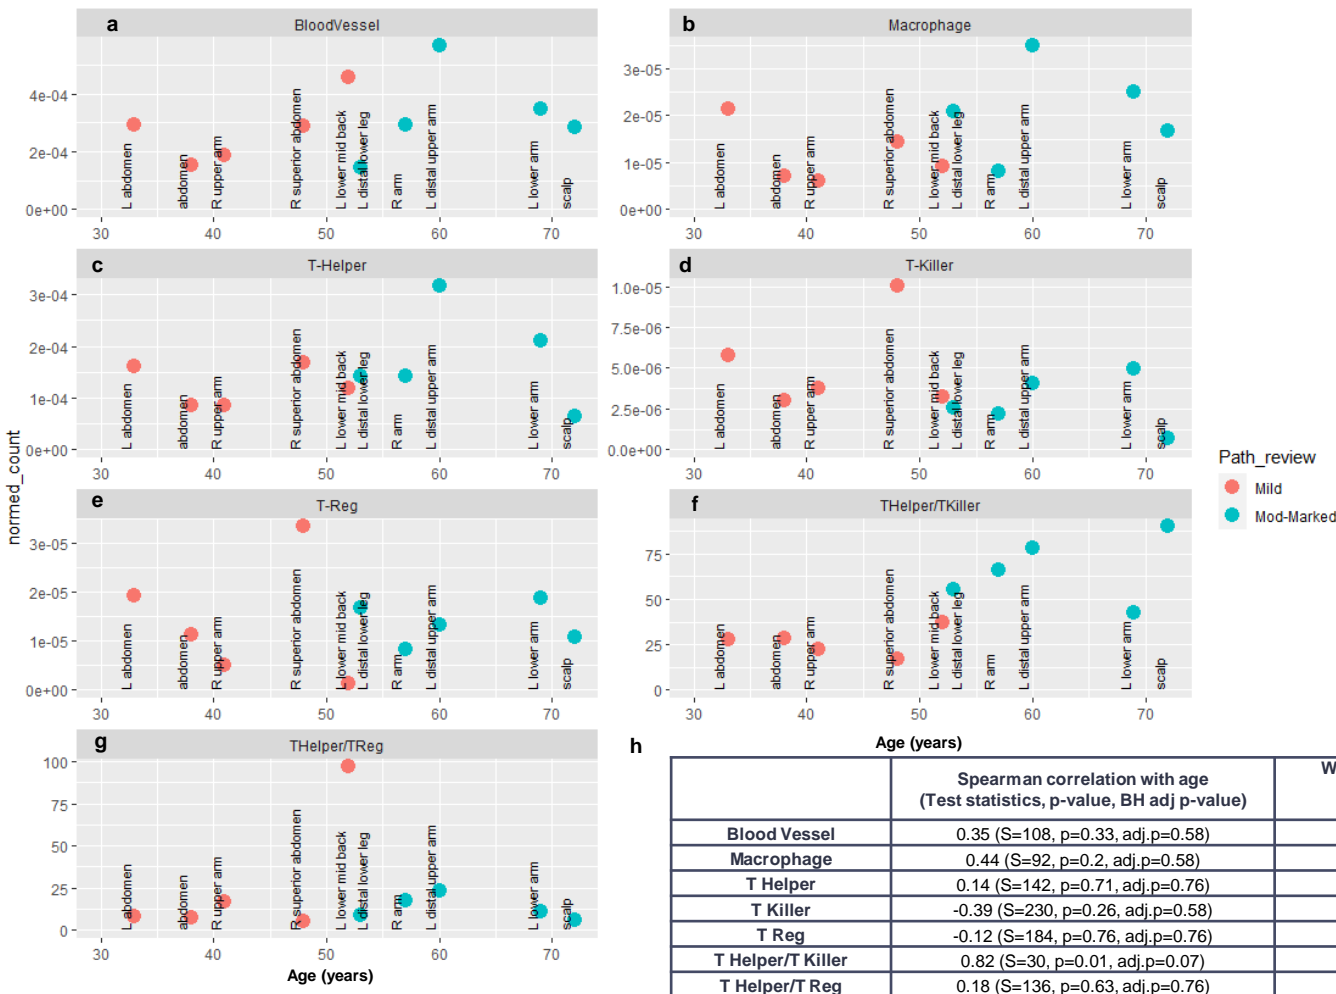



**Supplementary Figure 7** - Immune cell counts within 100 μm of endothelial cells and correlations with age/skin exposure to UV (a-d) and correlations (e); (iii) There was a trend for an inverse relationship between T Killer cell counts within 100 μm of endothelial cells and age (adj.p=0.08) (see panel e)

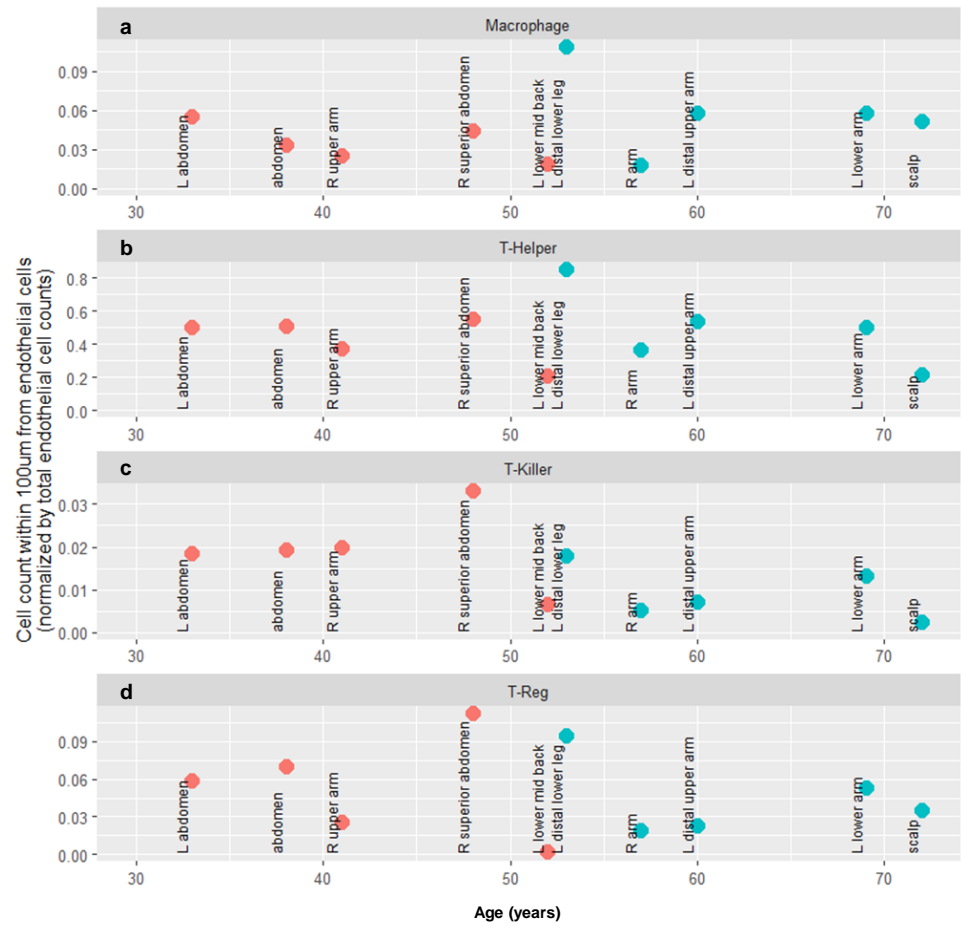

Path\_review  
 ● Mild  
 ● Mod-Marked

| e          | Spearman correlation with age (Test statistics, p-value, BH adj p-value) | Wilcoxon test with UV exposure Test statistics (p-value, BH adj p-value) |
|------------|--------------------------------------------------------------------------|--------------------------------------------------------------------------|
| Macrophage | 0.27 (S=120, p=0.45, adj.p=0.6)                                          | W=120 (p=0.22, adj.p=0.44)                                               |
| T Helper   | -0.14 (S=188, p=0.71, adj.p=0.71)                                        | W=188 (p=0.84, adj.p=0.84)                                               |
| T Killer   | -0.73 (S=286, p=0.02, adj.p=0.08)                                        | W=286 (p=0.06, adj.p=0.22)                                               |
| T Reg      | -0.32 (S=218, p=0.37, adj.p=0.6)                                         | W=218 (p=0.69, adj.p=0.84)                                               |

**Supplementary Figure 8 - p53 and Ki67 positive cells deep in the epidermis are associated with hair follicle regions:** Region 1 (scalp, marked sun exposure, 72 years) shows a higher distribution of p53 and Ki67 positive cells associated with hair follicle cells and up to 1600  $\mu\text{m}$  deep with a reference virtual H&E section from the same sample with a hair follicle highlighted. For interactive visualization go to: [https://hubmapconsortium.github.io/vccf-visualization-release/html/epidermis\\_entire/epidermis\\_region\\_1.html](https://hubmapconsortium.github.io/vccf-visualization-release/html/epidermis_entire/epidermis_region_1.html)

**a**

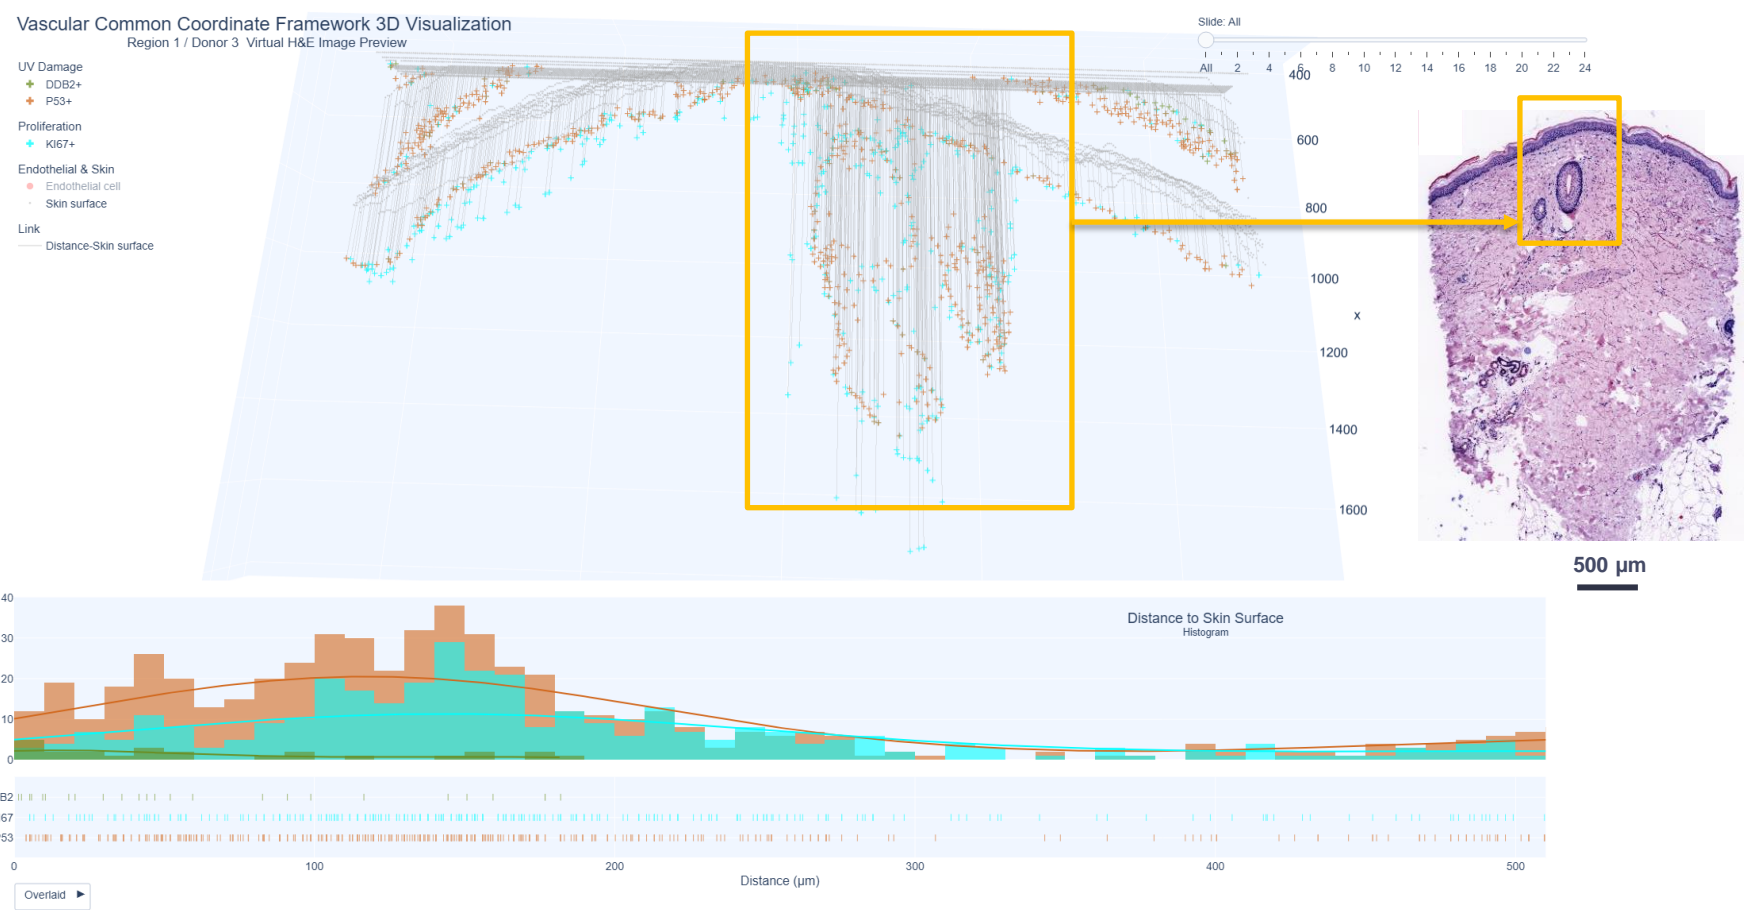

**Supplementary Figure 8** – Region 2 (lower mid back, mild sun exposure, 52 years) shows a higher distribution of p53 and Ki67 positive cells associated with hair follicle cells and up to 1600  $\mu\text{m}$  deep and a reference virtual H&E section from the same sample with a hair follicle along the edge is highlighted. For interactive visualization go to: [https://hubmapconsortium.github.io/vccf-visualization-release/html/epidermis\\_entire/epidermis\\_region\\_2.html](https://hubmapconsortium.github.io/vccf-visualization-release/html/epidermis_entire/epidermis_region_2.html)

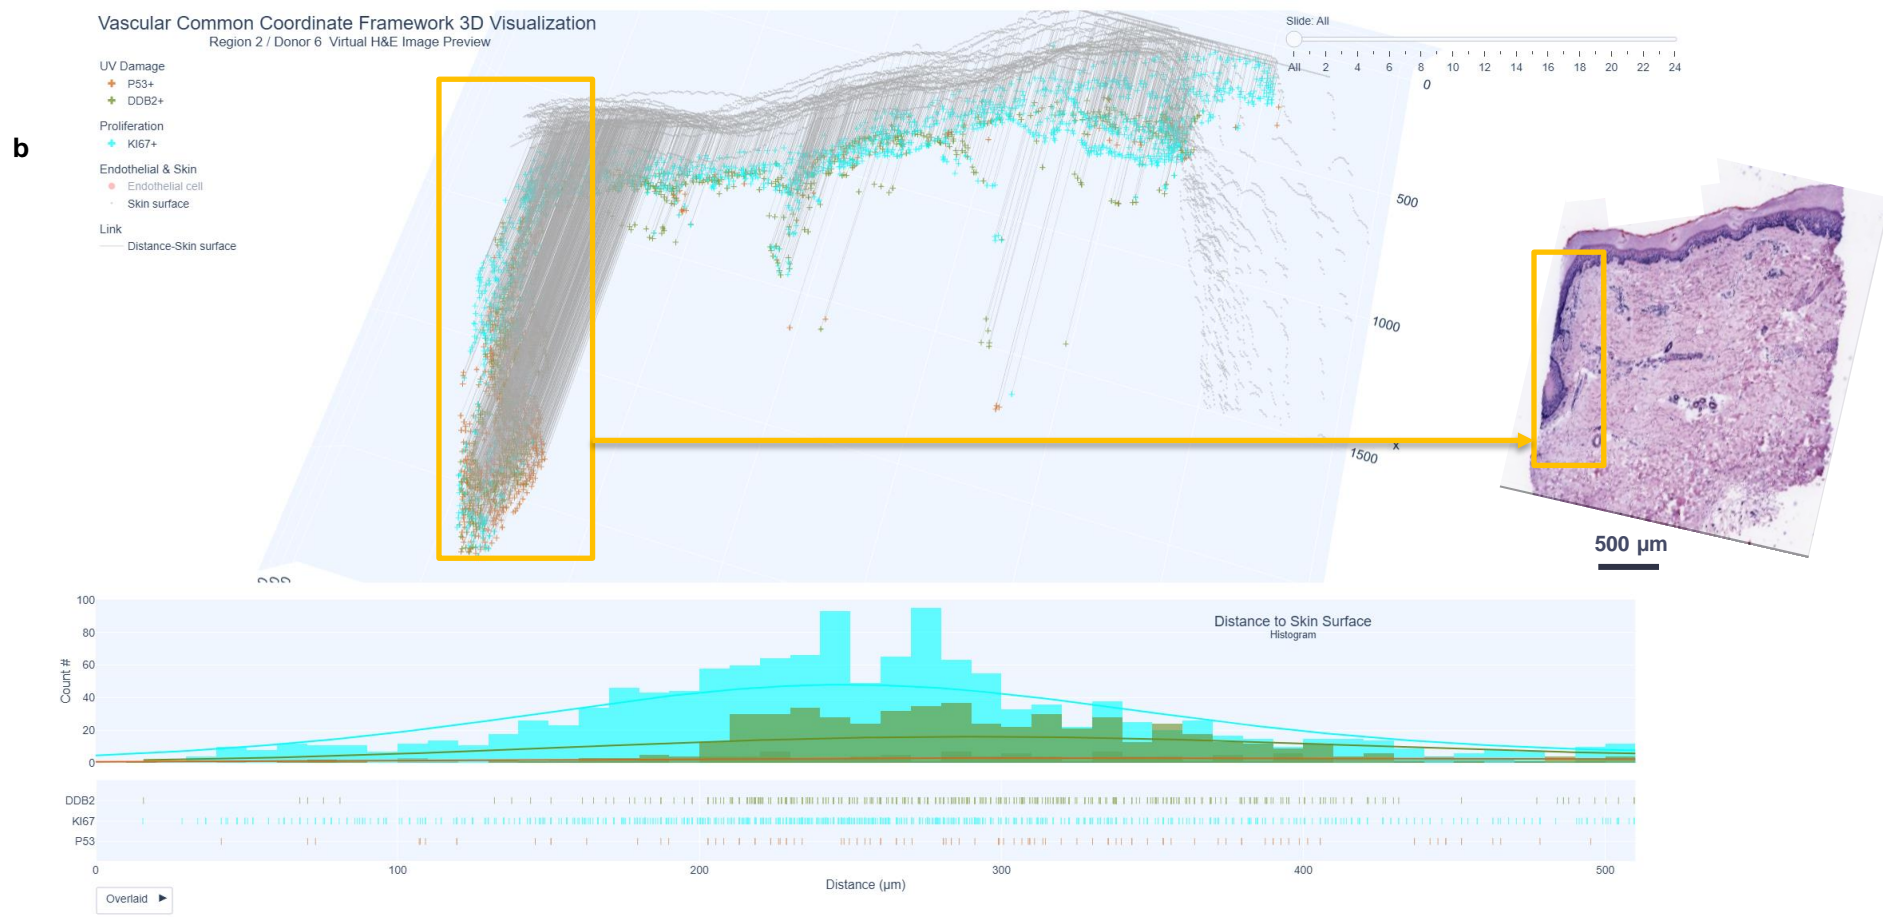

**Supplementary Figure 8** -. Region 9 (upper arm, marked sun exposure, 60 years) shows a higher distribution of p53 and Ki67 positive cells associated with hair follicle cells and up to 1600  $\mu\text{m}$  deep with a reference virtual H&E section from the same sample and highlighted hair follicle. For interactive visualization go to: [https://hubmapconsortium.github.io/vccf-visualization-release/html/epidermis\\_entire/epidermis\\_region\\_9.html](https://hubmapconsortium.github.io/vccf-visualization-release/html/epidermis_entire/epidermis_region_9.html)

### Vascular Common Coordinate Framework 3D Visualization

Region 9 / Donor 1 Virtual H&E Image Preview

UV Damage  
+ DDB2+  
+ P53+

Proliferation  
+ Ki67+

Endothelial & Skin  
● Endothelial cell  
● Skin surface

Link  
— Distance-Skin surface

Slide: All  
All 2 4 6 8 10 12 14 16 18 20 22 24

**c**

(i)

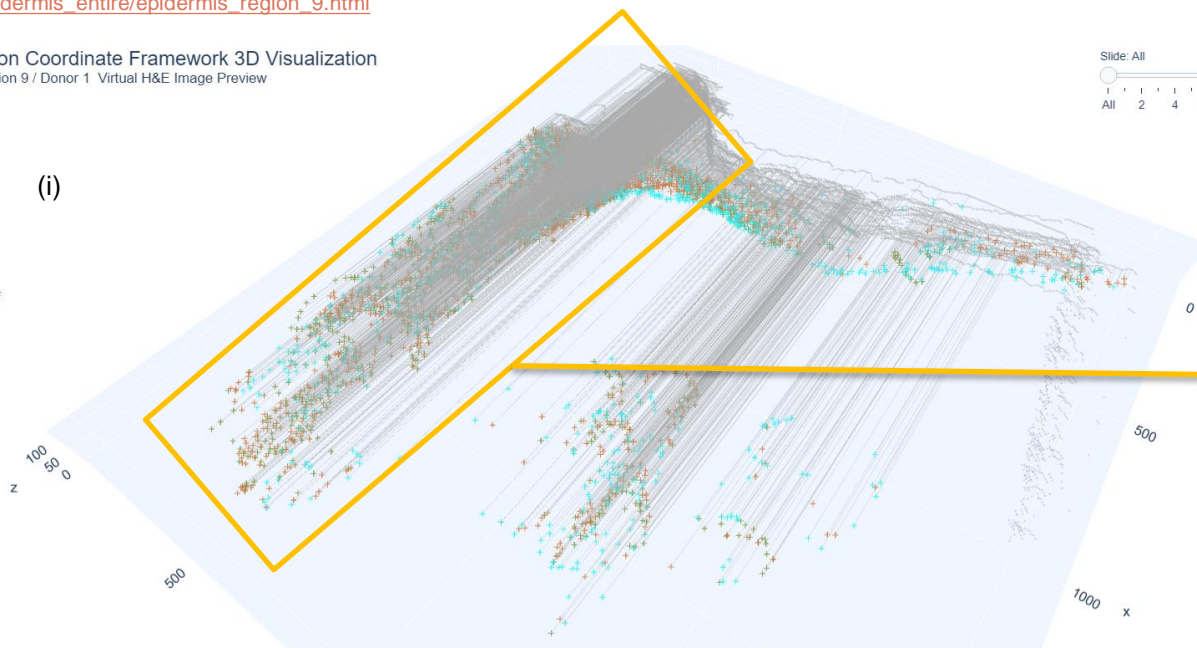

(ii)

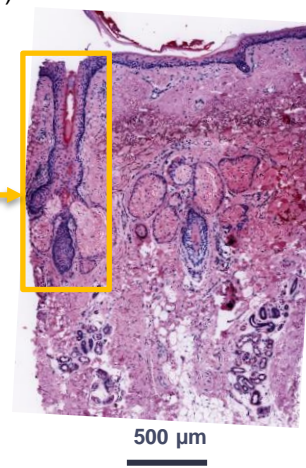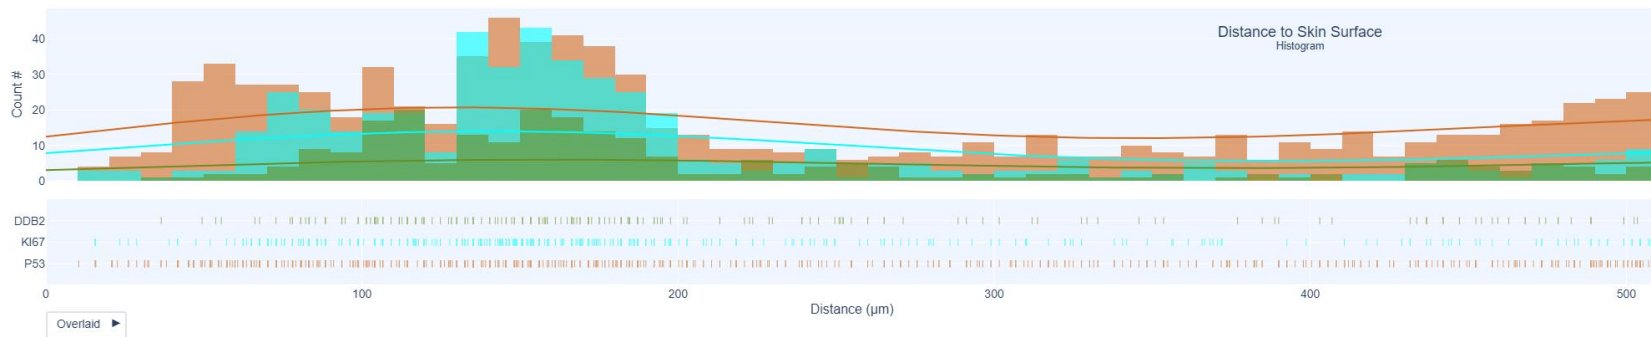

**Supplementary Figure 9** - Normalized epidermis (AE1/stratum basale layer) cell counts for DNA damage (DDB2 and p53) and proliferation (Ki67) (a-d); (e) correlations with age and skin exposure to UV. There was a significant inverse correlation between DDB2 positive cells and age (adj. p=0.05) (see panel e).

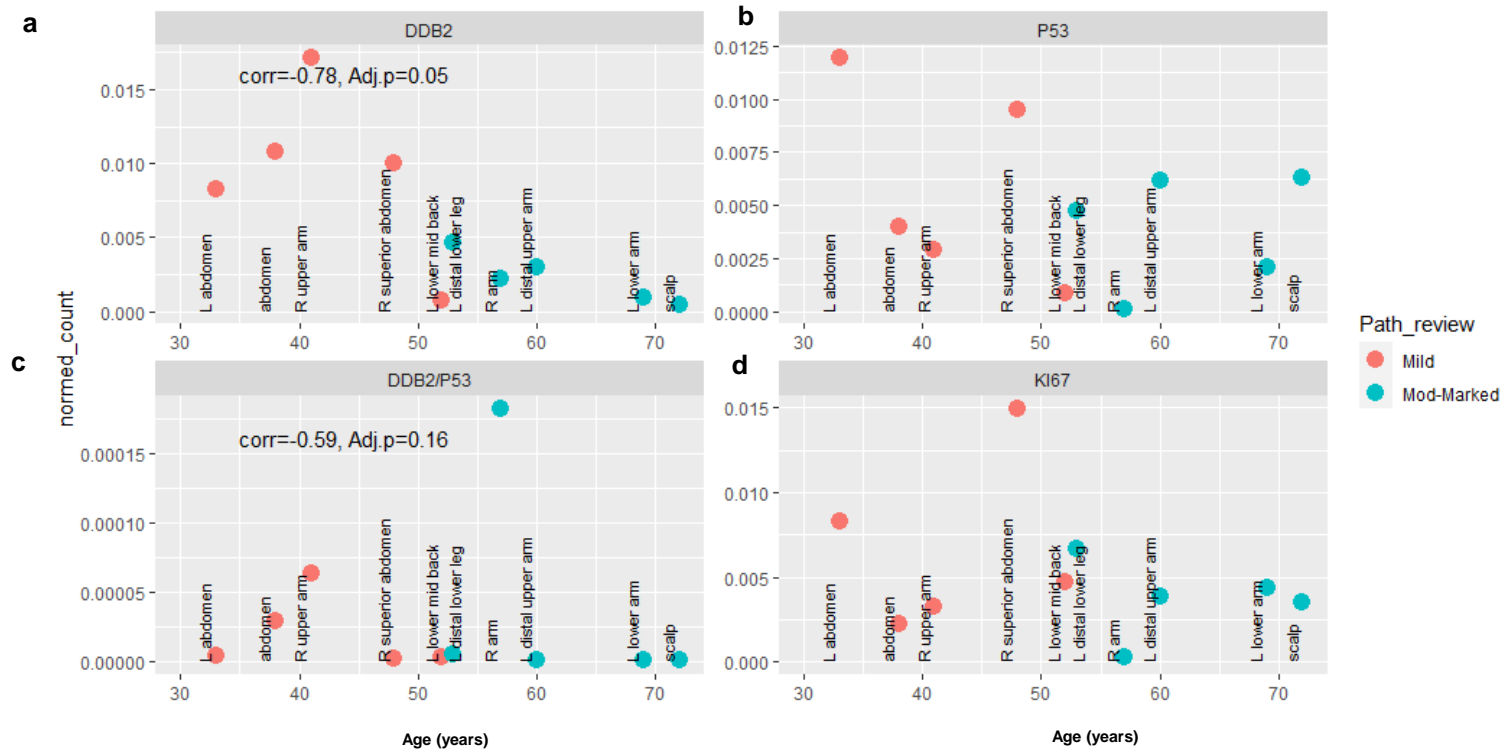

**e**

|                 | Spearman correlation with age<br>(Test statistics, p-value,<br>BH adj p-value) | Wilcoxon test with UV exposure<br>Test statistics<br>(p-value, BH adj p-value) |
|-----------------|--------------------------------------------------------------------------------|--------------------------------------------------------------------------------|
| <b>DDB2</b>     | -0.78 (S=294, p=0.01, adj.p=0.05)*                                             | W=294 (p=0.1, adj.p=0.38)                                                      |
| <b>P53</b>      | -0.22 (S=202, p=0.54, adj.p=0.58)                                              | W=202 (p=0.69, adj.p=0.69)                                                     |
| <b>DDB2/P53</b> | -0.59 (S=262, p=0.08, adj.p=0.16)                                              | W=262 (p=0.42, adj.p=0.69)                                                     |
| <b>KI67</b>     | -0.2 (S=198, p=0.58, adj.p=0.58)                                               | W=198 (p=0.55, adj.p=0.69)                                                     |

**Supplementary Figure 9** - Normalized epidermis (CK26/entire epidermis) cell counts for DNA damage (DDB2 and p53) and proliferation (Ki67) (f-i); (J) correlations with age and skin exposure to UV. There is a significant inverse correlation between DDB2 positive cells and age (adj. p=0.04) (see panel j).

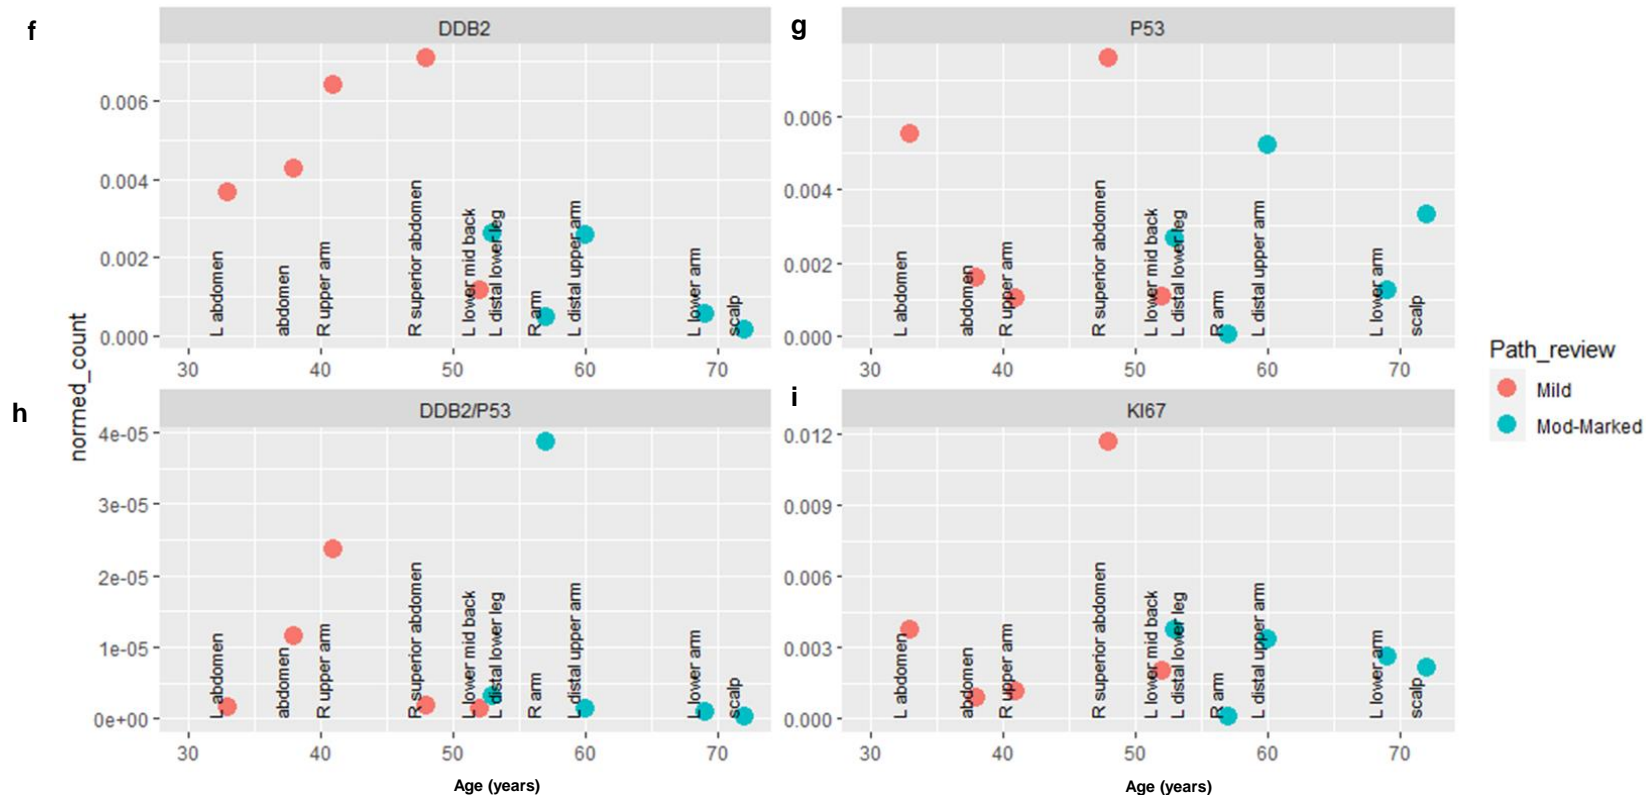

**j**

|          | Spearman correlation with age<br>(Test statistics, p-value,<br>BH adj p-value) | Wilcoxon test with UV exposure<br>Test statistics<br>(p-value, BH adj p-value) |
|----------|--------------------------------------------------------------------------------|--------------------------------------------------------------------------------|
| DDB2     | -0.79 (S=296, p=0.01, adj.p=0.04)*                                             | W=296 (p=0.03, adj.p=0.13)                                                     |
| P53      | -0.12 (S=184, p=0.76, adj.p=0.86)                                              | W=184 (p=0.84, adj.p=1)                                                        |
| DDB2/P53 | -0.53 (S=252, p=0.12, adj.p=0.25)                                              | W=252 (p=0.55, adj.p=1)                                                        |
| Ki67     | -0.07 (S=176, p=0.86, adj.p=0.86)                                              | W=176 (p=1, adj.p=1)                                                           |

**Supplementary Figure 10 – a** Virtual H&E of region 11 from 41-year-old donor (upper arm) with mild sun exposure; **b** Region 7 from 69-year-old donor (lower arm) with marked sun exposure based on pathologist review and standardized assessment criteria.

**a**

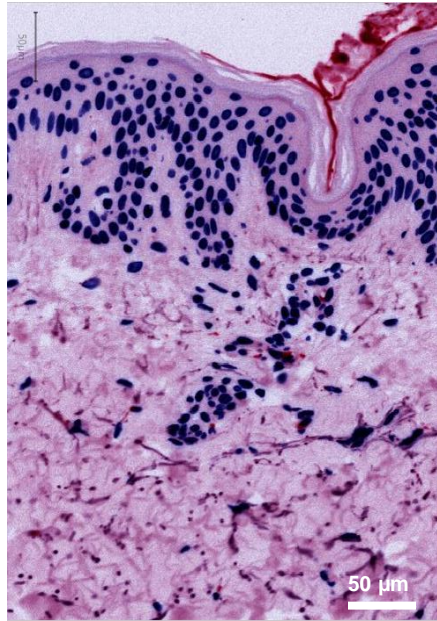

**b**

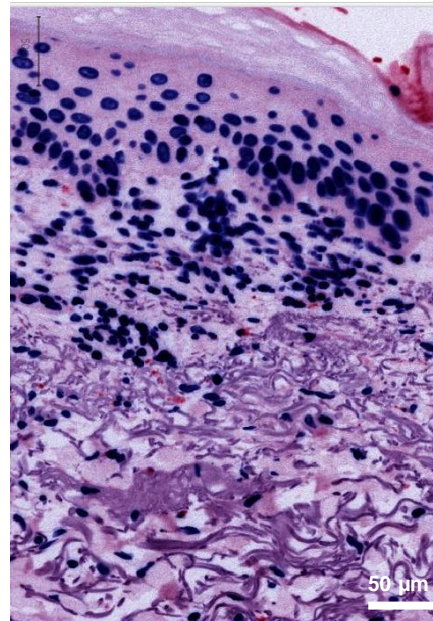

**Supplementary Figure 11** - Example images for pan cytokeratin PCK26 in earlier validation studies and in the multiplexed skin study. As described in methods, a multi-step process was utilized and is available on protocols.io [Cell DIVE™ Platform | Antibody Characterization for Multiplexing \(protocols.io\)](https://www.protocols.io). A multi-organ slide (Pantomics MTU391) containing tumor and corresponding uninvolved tissues as controls is used for screening antibodies and testing dye conjugates and concentrations. Example images for PCK26 are shown from prostate and from skin.

a

**Pan Cytokeratin - PCK26 - KRT 1, 5, 6A, 6B, 6C, 8  
(Sigma C5992).**

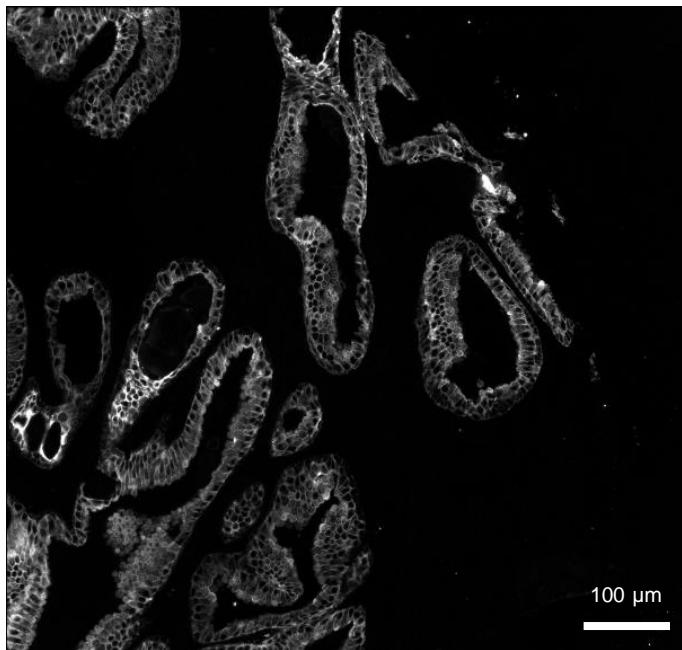

Normal prostate 3.3 D/P Cy3 at 2.5 μg/mL

**Region of interest with Pan CK26 staining in  
multiplexed skin sample**

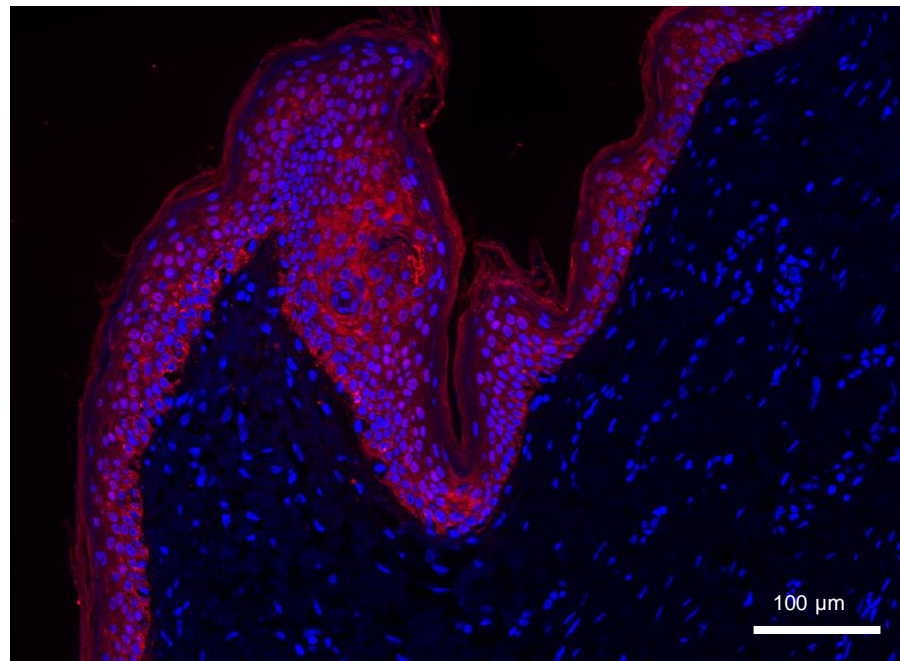

DAPI - Blue, PCK26 - Red



**Supplementary Figure 11** - Example images for pan cytokeratin AE1 in earlier validation studies and in the multiplexed skin study. As described in methods, a multi-step process was utilized and is available on protocols.io [Cell DIVE™ Platform | Antibody Characterization for Multiplexing \(protocols.io\)](#). A multi-organ slide (Pantomics MTU391) containing tumor and corresponding uninjured tissues as controls is used for screening antibodies and testing dye conjugates and concentrations. Example images for AE1 are from normal skin.

**b** Pan Cytokeratin AE1 - KRT10, 14, 15, 16, 19  
(Thermo Fisher 14-9001)

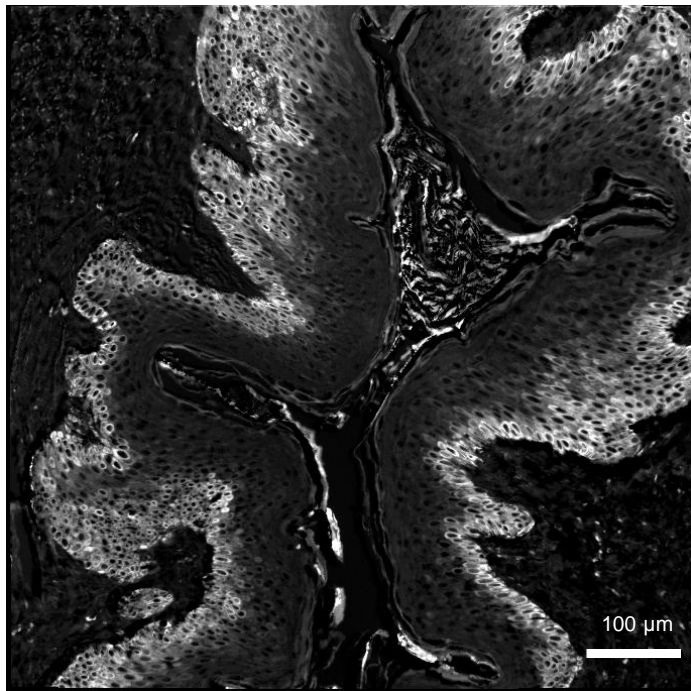

Normal skin 2.7 D/P Cy3 at 5 µg/mL

**Region of interest with AE1 staining in  
multiplexed skin sample**

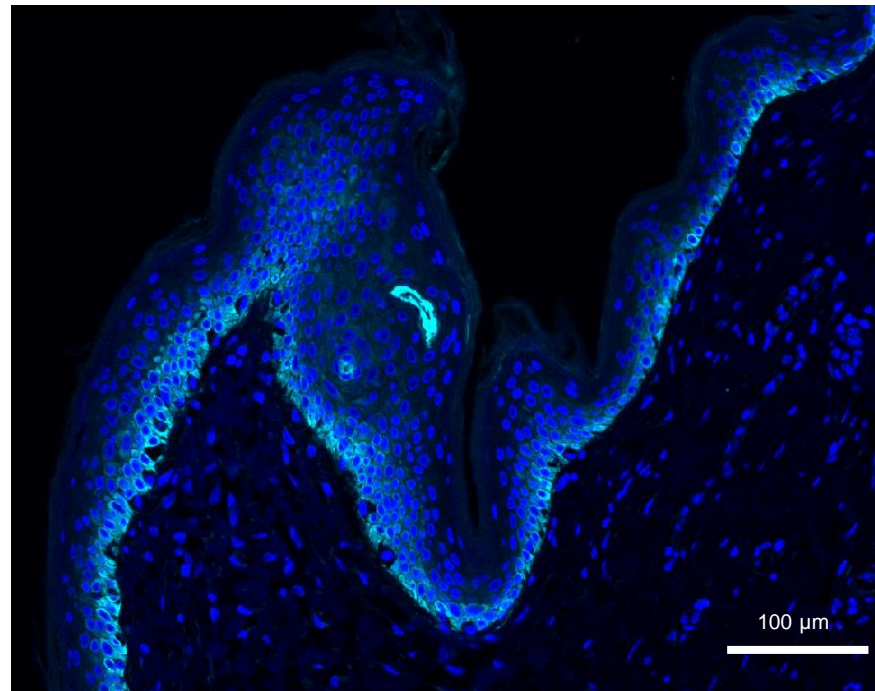

DAPI – Blue, AE1 - Cyan

**Supplementary Figure 11b (continued)** – Side by side comparison of Pan CK26 (red), AE1 (cyan) and both images combined as an overlay. CK26 stained the entire epidermis region and AE1 was more localized to the lower region of the epidermis (stratum basale).

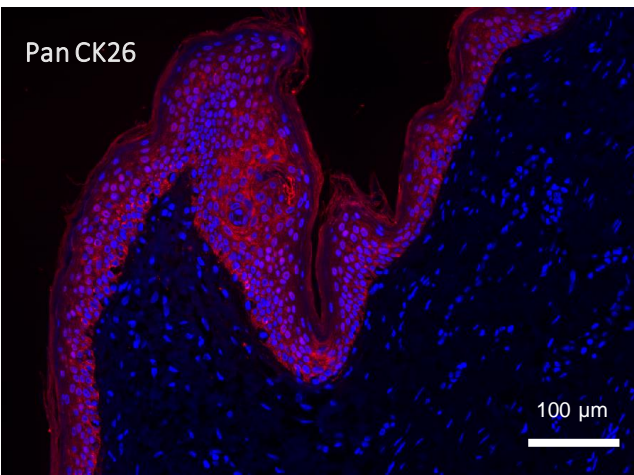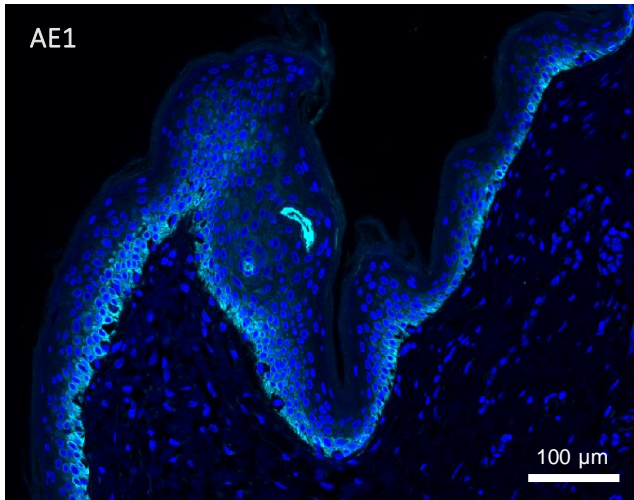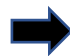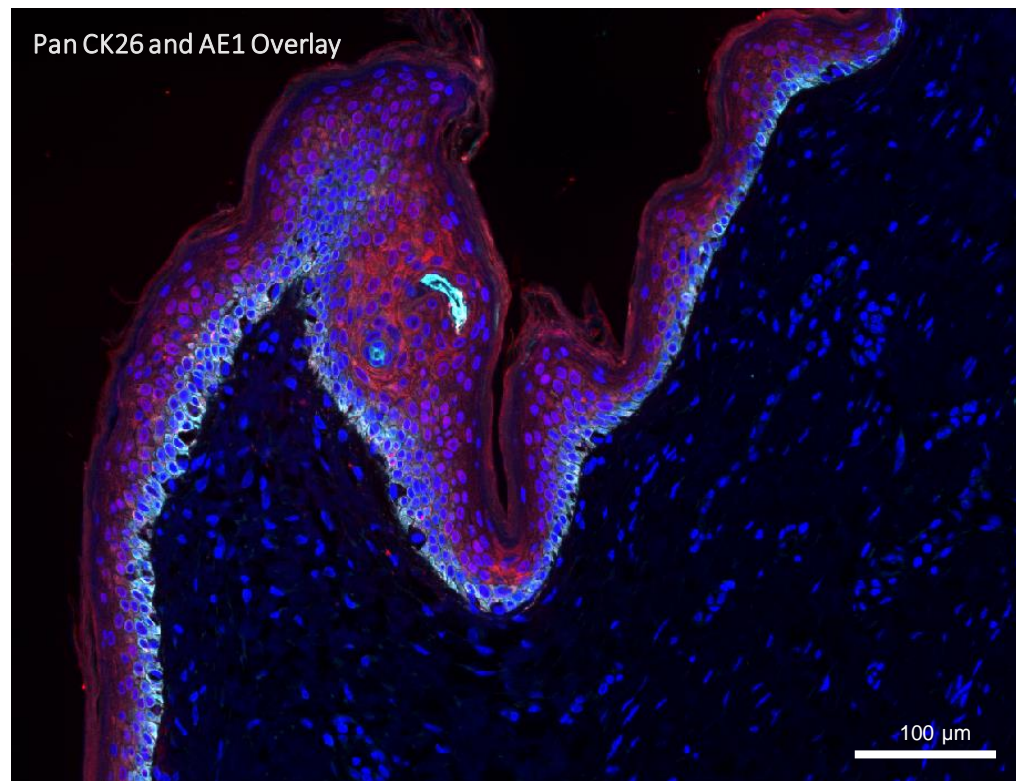

**Supplementary Figure 11** - images for Ki67 from earlier validation studies and in the multiplexed skin study. As described in methods, a multi-step process was utilized and is available on protocols.io [Cell DIVE™ Platform | Antibody Characterization for Multiplexing \(protocols.io\)](https://www.protocols.io). A multi-organ slide (Pantomics MTU391) containing tumor and corresponding uninvolved tissues as controls is used for screening antibodies and testing dye conjugates and concentrations. Example images for Ki67 are shown from lymph node and skin.

**C**      **Ki67 (Abcam ab196907, clone EPR3610)**

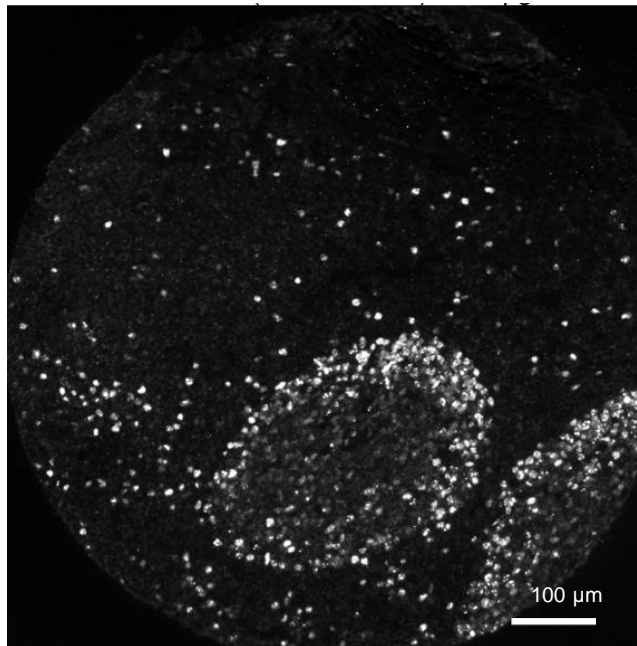

Lymph node – Commercial conjugate Cy5, 10 μg/mL

**Region of interest with Ki67 staining in multiplexed skin sample**

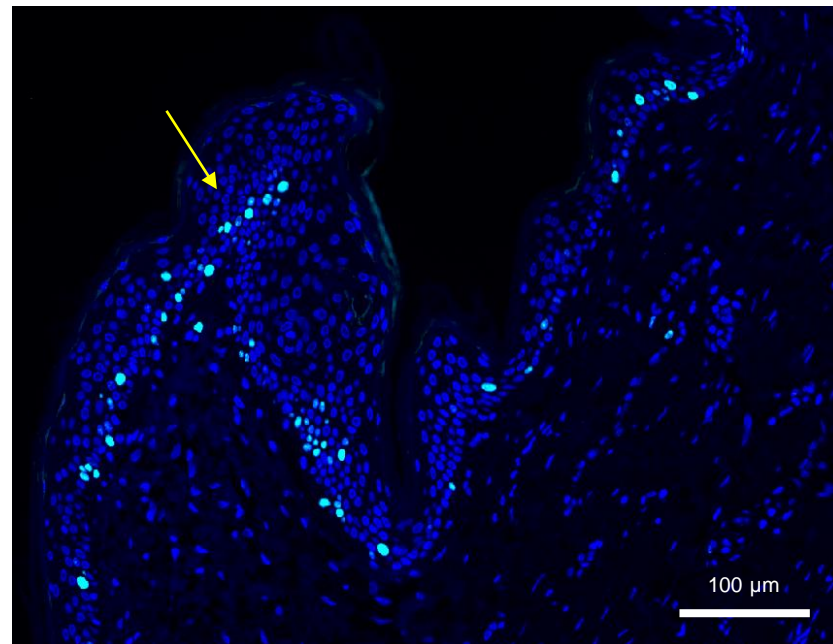

DAPI –Blue, Ki67 - Cyan

**Supplementary Figure 11** - images for p53 from earlier validation studies and in the multiplexed skin study. As described in methods, a multi-step process was utilized and is available on protocols.io [Cell DIVE™ Platform | Antibody Characterization for Multiplexing \(protocols.io\)](https://www.protocols.io). A multi-organ slide (Pantomics MTU391) containing tumor and corresponding uninvolved tissues as controls is used for screening antibodies and testing dye conjugates and concentrations. Example images for p53 are shown from stomach adenocarcinoma and skin.

**d** **P53 (DAKO M7001, DO-7)**

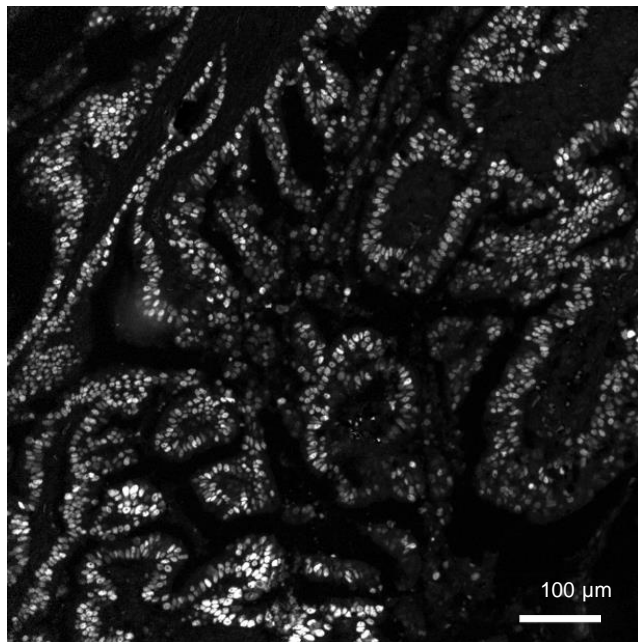

Stomach adenocarcinoma – 1.5 D/P Cy5 at 2 μg/mL

**Region of interest with p53 staining in multiplexed skin sample**

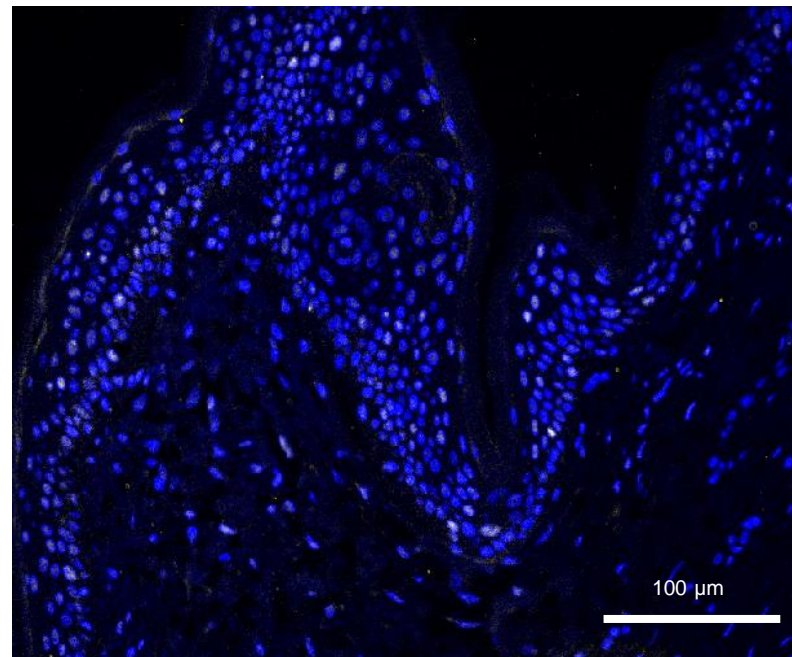

DAPI –Blue, p53 - Yellow

**Supplementary Figure 11** - Example images for DDB2 in earlier validation studies and in the multiplexed skin study. As described in methods, a multi-step process was utilized and is available on protocols.io [Cell DIVE™ Platform | Antibody Characterization for Multiplexing \(protocols.io\)](https://www.protocols.io). A multi-organ slide (Pantomics MTU391) containing tumor and corresponding uninvolved tissues as controls is used for screening antibodies and testing dye conjugates and concentrations. Example images for DDB2 are shown for normal bladder and skin.

**e**      **DDB2 (Abcam ab181136, clone EPR9811)**

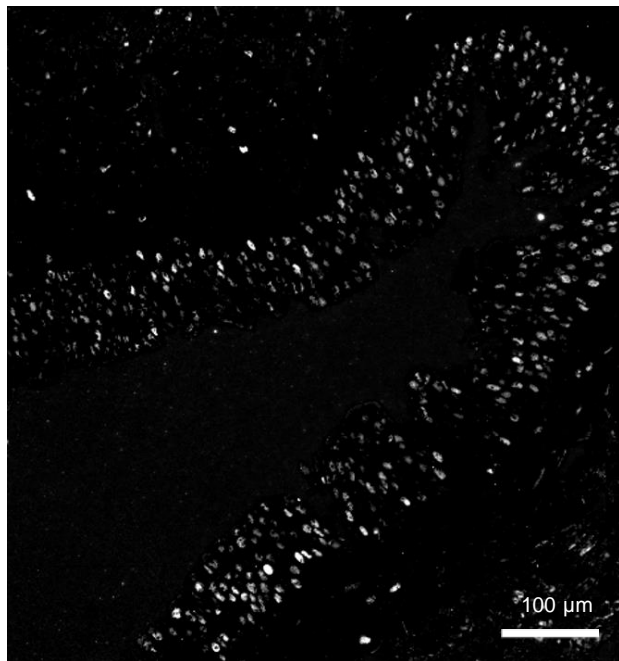

Normal bladder – secondary detection with Cy3 at  
6.2  $\mu\text{g/mL}$

**Region of interest with DDB2 staining in multiplexed skin sample**

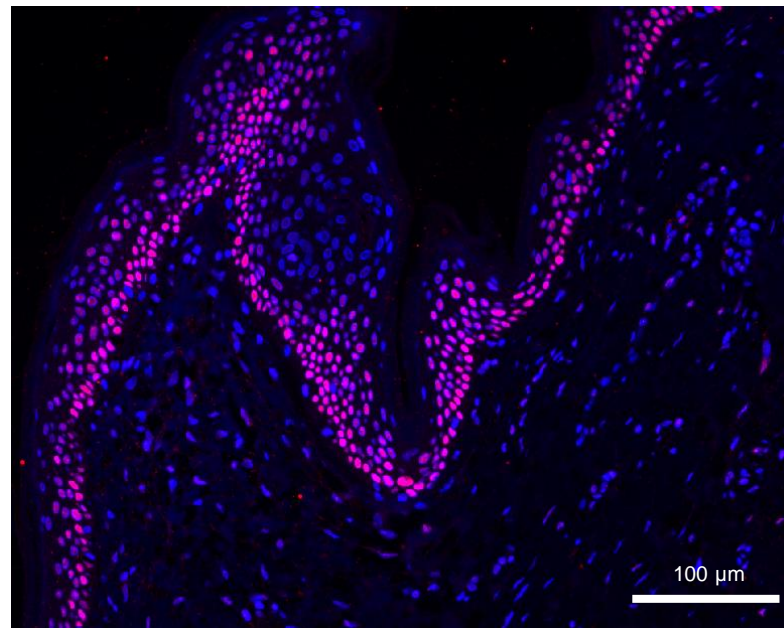

DAPI – Blue, DDB2 - Magenta

**Supplementary Figure 11** - Example images for Na+K+ATPase from earlier validation studies and in the multiplexed skin study. As described in methods, a multi-step process was utilized and is available on protocols.io [Cell DIVE™ Platform | Antibody Characterization for Multiplexing \(protocols.io\)](https://www.protocols.io/view/cell-dive-platform-antibody-characterization-for-multiplexing-1234567890). A multi-organ slide (Pantomics MTU391) containing tumor and corresponding uninvolved tissues as controls is used for screening antibodies and testing dye conjugates and concentrations. Example images for Na+K+ATPase are shown for breast carcinoma and skin.

f

**Na+K+ATPase (Abcam ab167390, clone EP1845Y)**

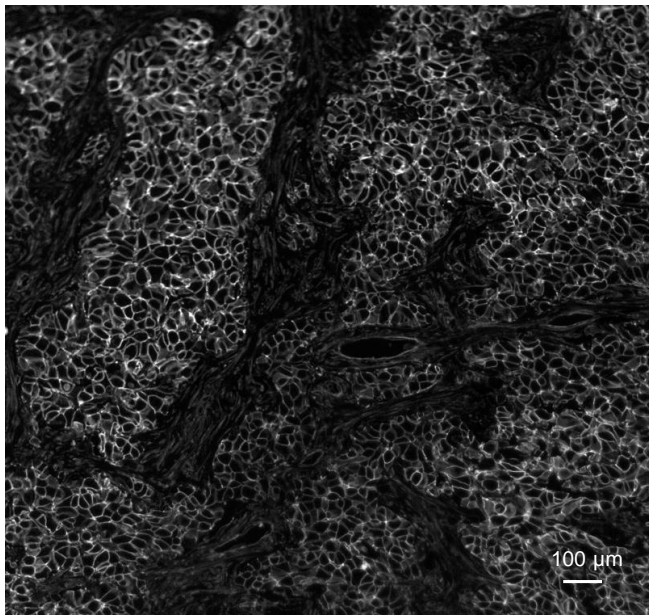

Breast carcinoma –4.2 D/P Cy3 at 5 μg/mL

**Region of interest with Na+K+ATPase staining in multiplexed skin sample**

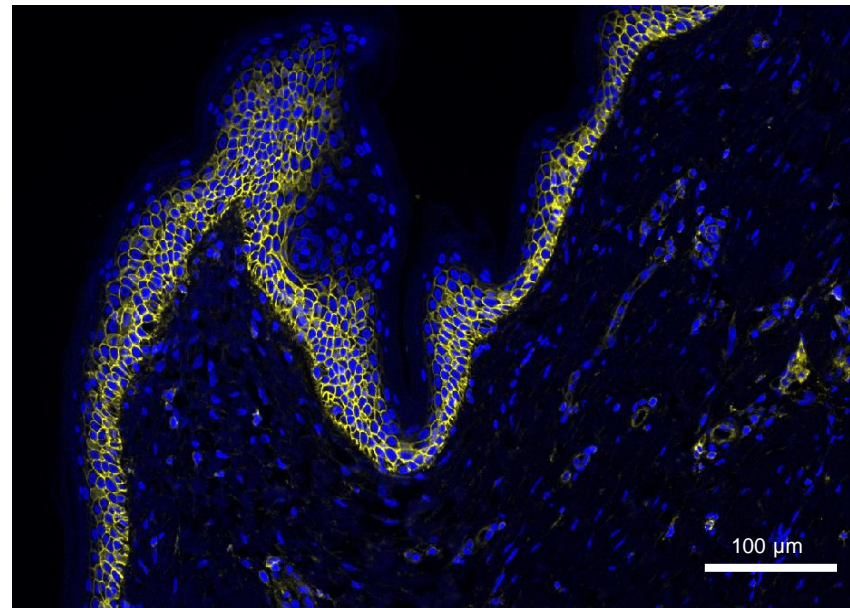

DAPI – Blue, Na+K+ATPase - Yellow

**Supplementary Figure 11** - Example images for pan-cadherin from earlier validation studies and in the multiplexed skin study. As described in methods, a multi-step process was utilized and is available on protocols.io [Cell DIVE™ Platform | Antibody Characterization for Multiplexing \(protocols.io\)](#). A multi-organ slide (Pantomics MTU391) containing tumor and corresponding uninvolved tissues as controls is used for screening antibodies and testing dye conjugates and concentrations. Example images for pan-cadherin are shown for normal liver and skin.

g

**Pan Cadherin (1-13, 15-20, 22-24) (NeoMarkers, RB-9036, polyclonal antibody)**

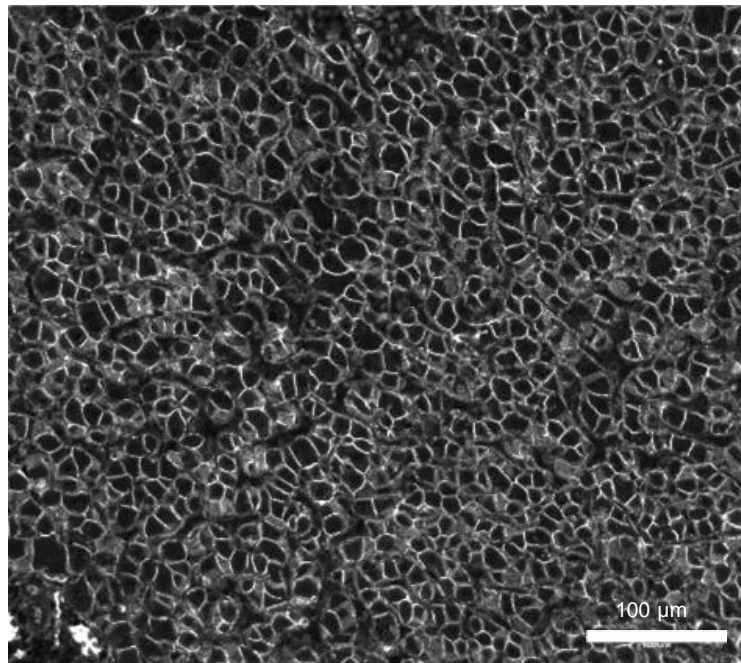

Normal liver – 2.7 D/P Cy5 at 5 μg/mL

**Region of interest with pan-cadherin staining in multiplexed skin sample**

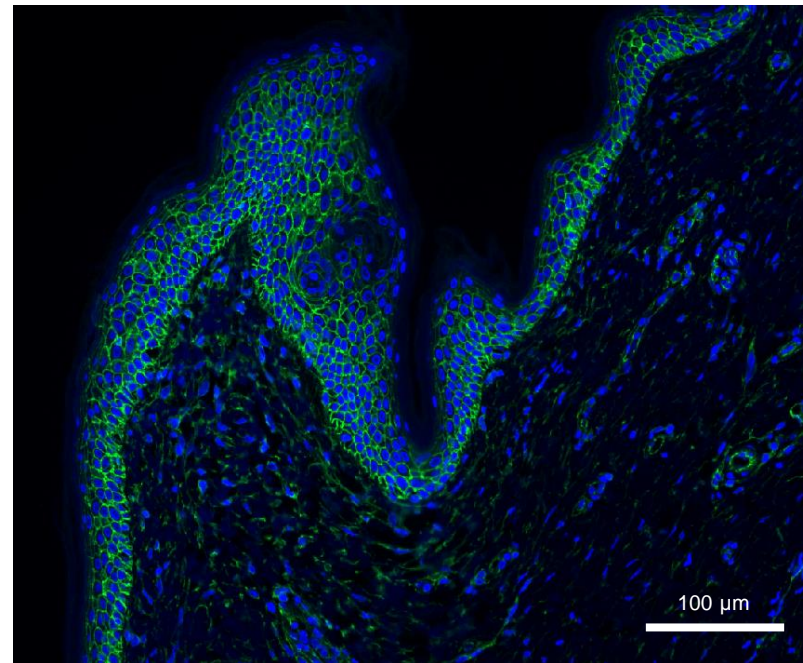

DAPI – Blue, Pan-cadherin - Green

**Supplementary Figure 11** - Example images for CD3 from earlier validation studies and in the multiplexed skin study. As described in methods, a multi-step process was utilized and is available on protocols.io [Cell DIVE™ Platform | Antibody Characterization for Multiplexing \(protocols.io\)](https://www.protocols.io). A multi-organ slide (Pantomics MTU391) containing tumor and corresponding uninvolved tissues as controls is used for screening antibodies and testing dye conjugates and concentrations. Example images for CD3 are shown for breast lymph node and skin.

**h** **CD3 (DAKO M7254, Clone F7.2.38)**

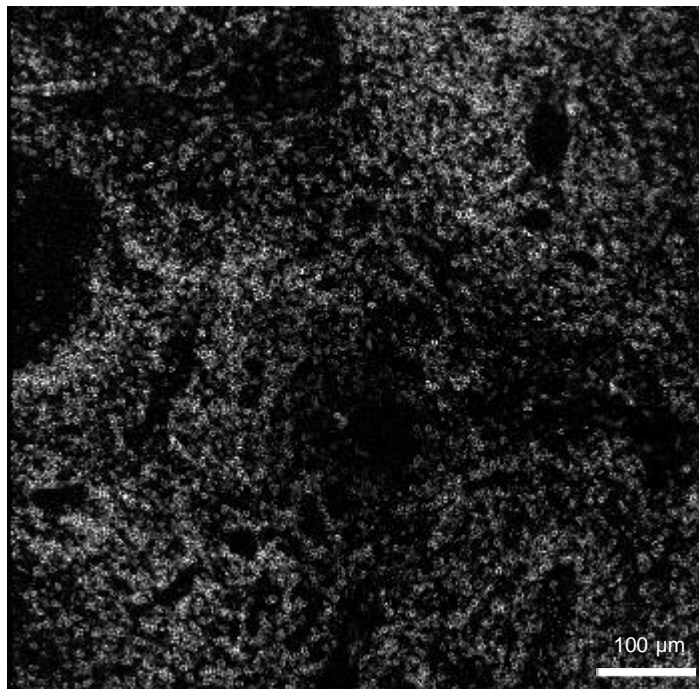

Reactive lymph node 2.5 D/P Cy5 at 5 μg/mL

**Region of interest with CD3 staining in multiplexed skin sample**

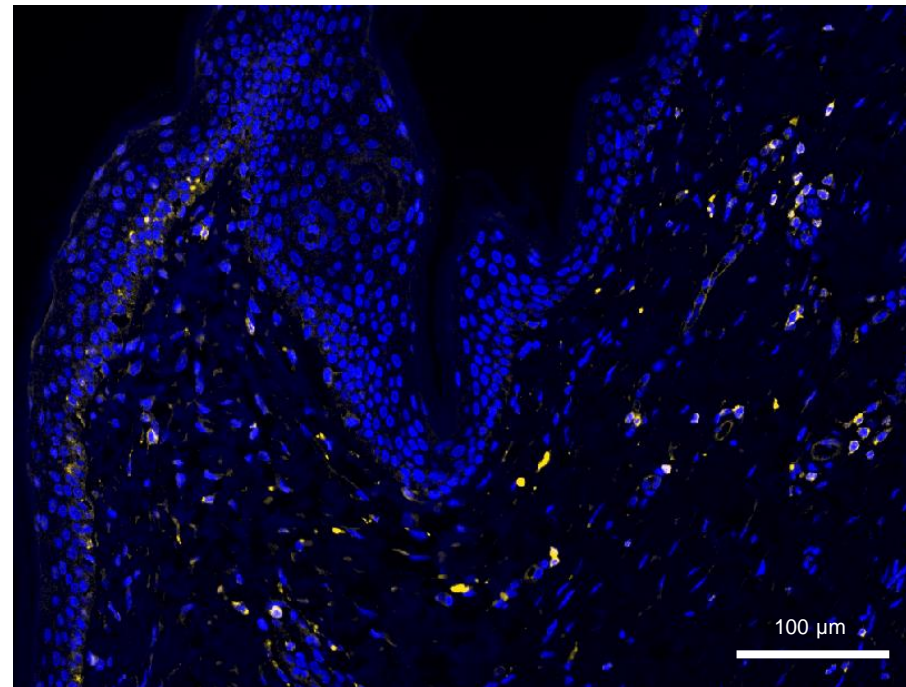

DAPI - Blue, CD3 - Yellow



**Supplementary Figure 11** - Example images for CD4 from earlier validation studies and in the multiplexed skin study. As described in methods, a multi-step process was utilized and is available on protocols.io [Cell DIVE™ Platform | Antibody Characterization for Multiplexing \(protocols.io\)](https://www.protocols.io). A multi-organ slide (Pantomics MTU391) containing tumor and corresponding uninjured tissues as controls is used for screening antibodies and testing dye conjugates and concentrations. Example images for CD4 are shown for lymph node and skin.

i

### CD4 (Abcam ab181724, clone EPR6855)

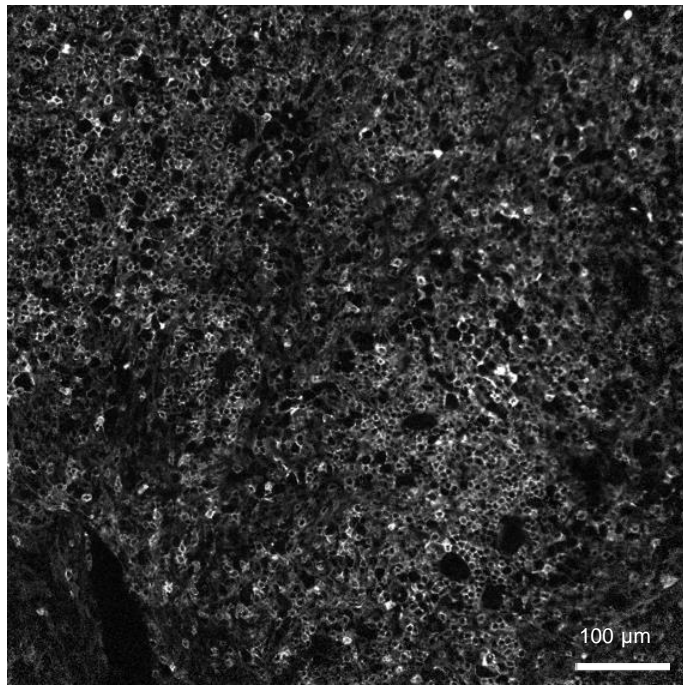

Lymph node, 5.1 D/P Cy3 at 5 μg/mL

### Region of interest with CD4 staining in multiplexed skin sample

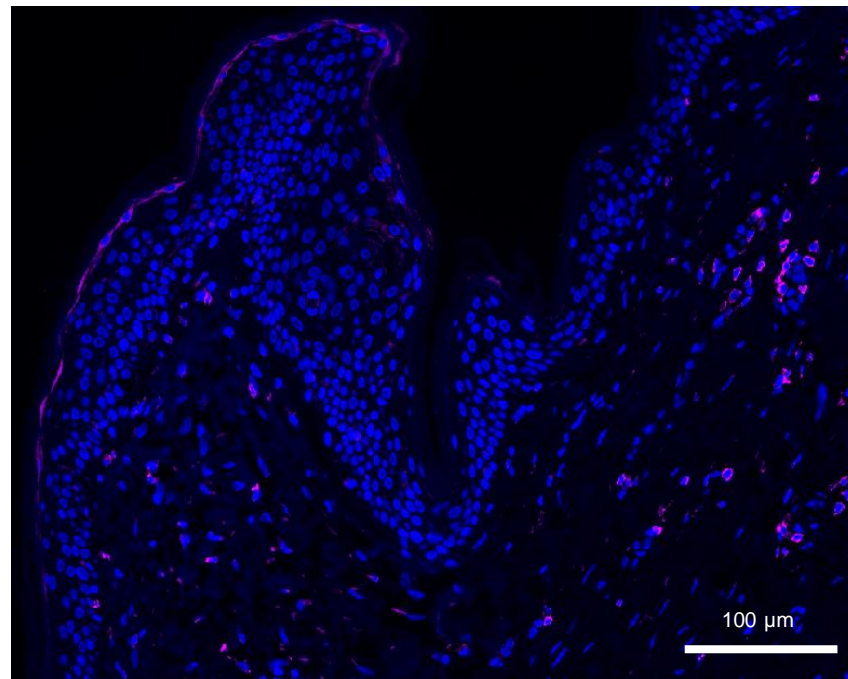

DAPI - Blue, CD4 - Magenta

**Supplementary Figure 11** - Example images for FOXP3 from earlier validation studies and in the multiplexed skin study. As described in methods, a multi-step process was utilized and is available on protocols.io [Cell DIVE™ Platform | Antibody Characterization for Multiplexing \(protocols.io\)](https://www.protocols.io). A multi-organ slide (Pantomics MTU391) containing tumor and corresponding uninjured tissues as controls is used for screening antibodies and testing dye conjugates and concentrations. Example images for FOXP3 are shown for lymph node and skin.

**FOXP3 (Biolegend 320114, Clone 206D)**

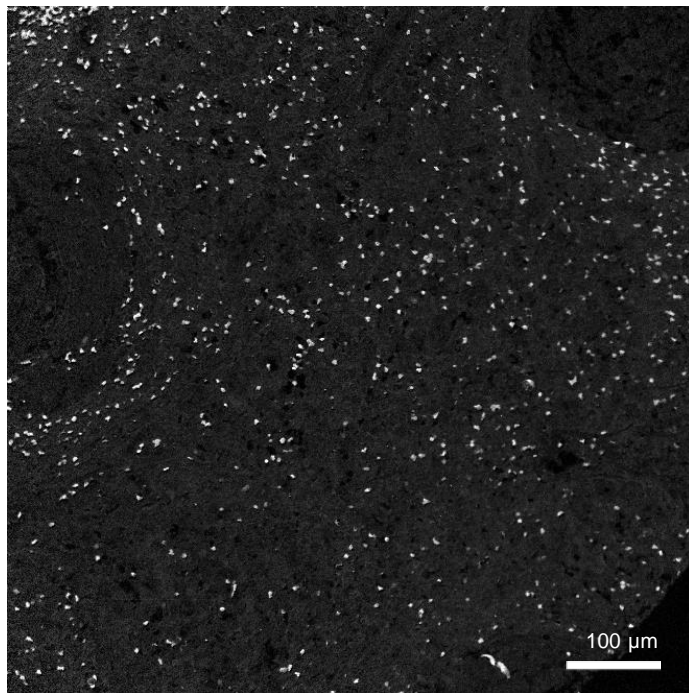

Reactive lymph node, Alexa 647 commercial conjugate, 10 μg/mL

**Region of interest with FOXP3 staining in multiplexed skin sample**

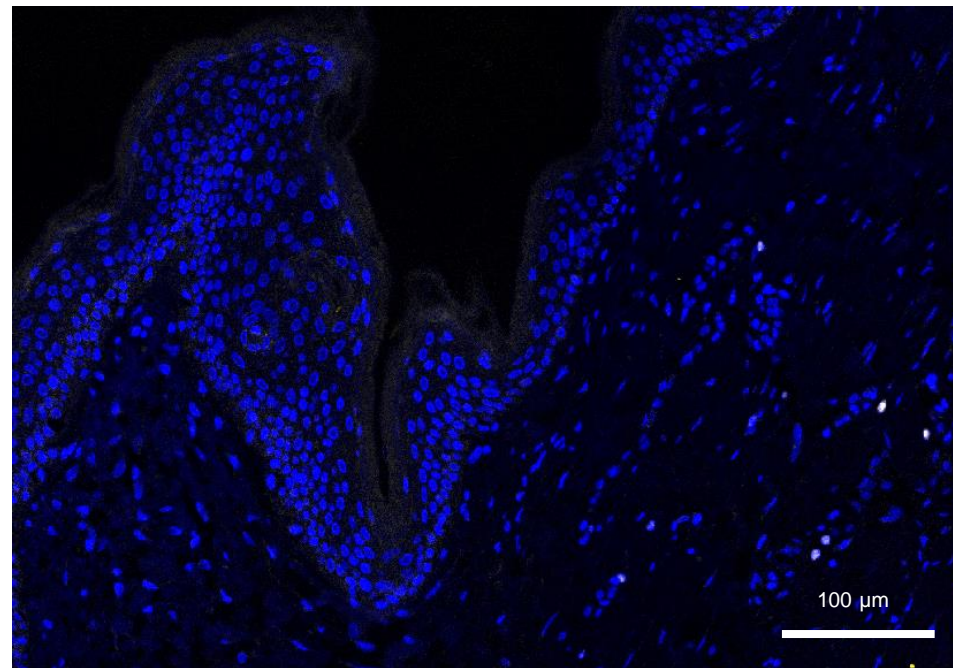

DAPI - Blue, FOXP3 - Yellow

**Supplementary Figure 11** - Example images for CD8 from earlier validation studies and in the multiplexed skin study. As described in methods, a multi-step process was utilized and is available on protocols.io [Cell DIVE™ Platform | Antibody Characterization for Multiplexing \(protocols.io\)](https://www.protocols.io/Cell-DIVE-Platform-Antibody-Characterization-for-Multiplexing). A multi-organ slide (Pantomics MTU391) containing tumor and corresponding uninjured tissues as controls is used for screening antibodies and testing dye conjugates and concentrations. Example images for CD8 are shown for stomach adenocarcinoma and skin.

**k** **CD8 (DAKO M7103, Clone C8144B)**

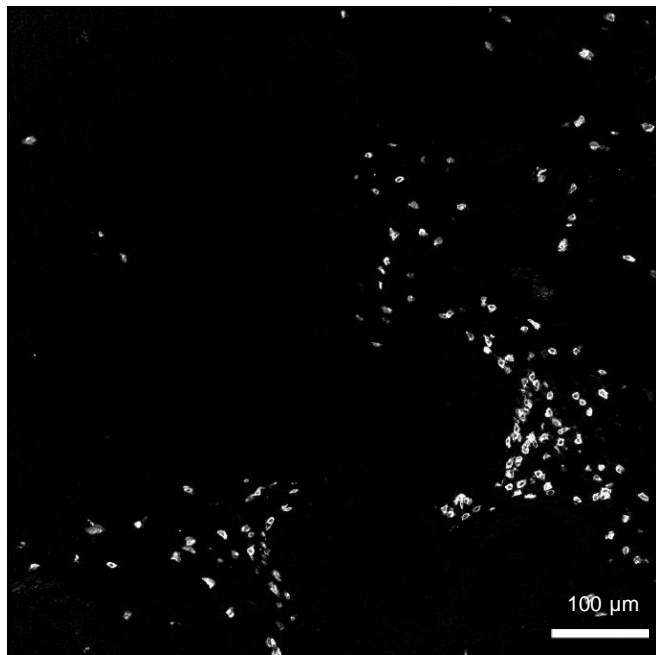

Stomach Adenocarcinoma 2.6 D/P Cy5 at 5 μg/mL

**Region of interest with CD8 staining in multiplexed skin sample**

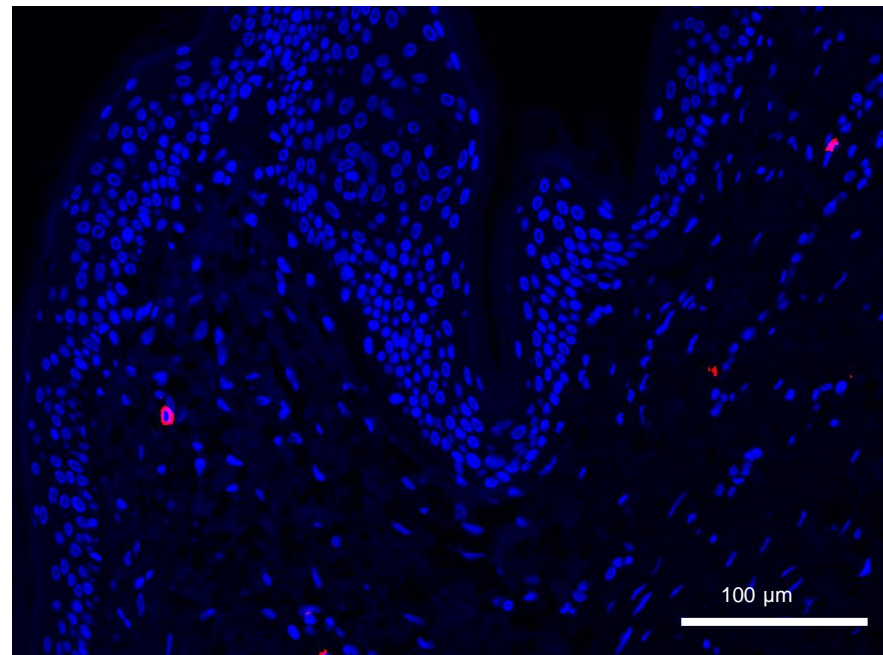

DAPI - Blue, CD8 - Red

**Supplementary Figure 11** - Example images for CD68 from earlier validation studies and in the multiplexed skin study. As described in methods, a multi-step process was utilized and is available on protocols.io [Cell DIVE™ Platform | Antibody Characterization for Multiplexing \(protocols.io\)](https://www.protocols.io). A multi-organ slide (Pantomics MTU391) containing tumor and corresponding uninvolved tissues as controls is used for screening antibodies and testing dye conjugates and concentrations. Example images for CD68 are shown for invasive breast carcinoma and skin.

### CD68 (Thermo Fisher MS-397-PABX, clone KP1)

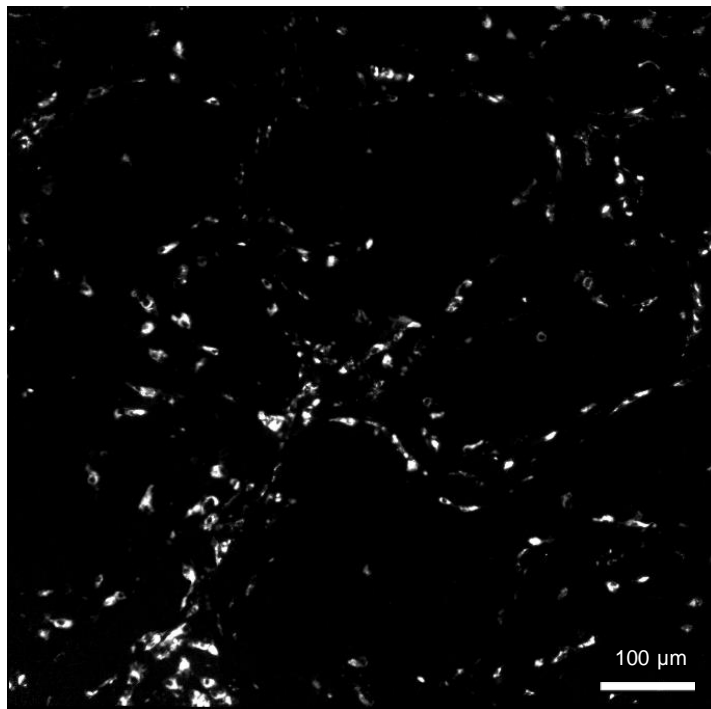

Invasive breast carcinoma 4.0 D/P Cy5 at 3.5 μg/mL

### Region of interest with CD68 staining in multiplexed skin sample

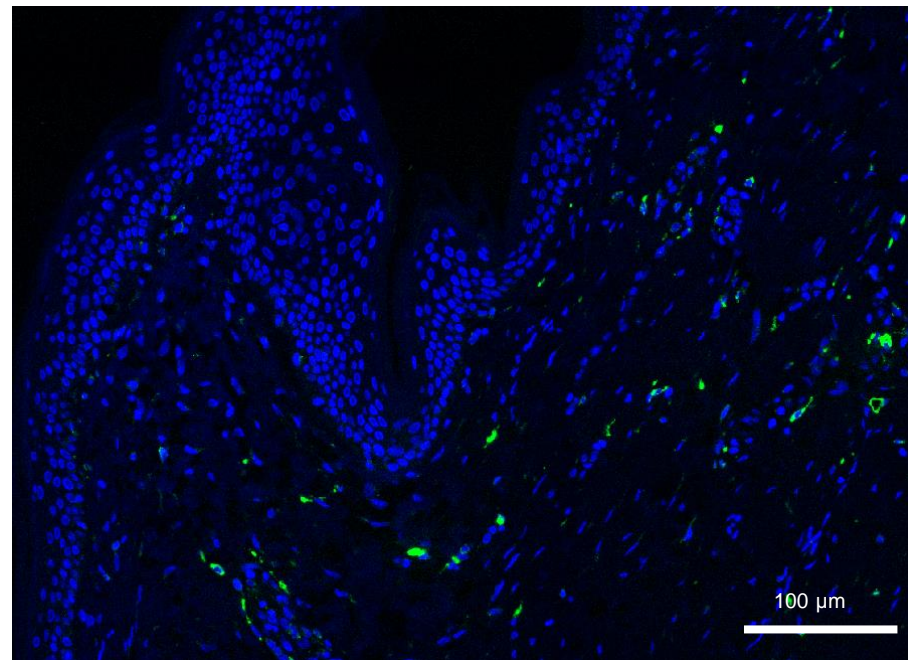

DAPI - Blue, CD68 - Green

**Supplementary Figure 11** - Example images for vimentin from earlier validation studies and in the multiplexed skin study. As described in methods, a multi-step process was utilized and is available on protocols.io [Cell DIVE™ Platform | Antibody Characterization for Multiplexing \(protocols.io\)](#). A multi-organ slide (Pantomics MTU391) containing tumor and corresponding uninjured tissues as controls is used for screening antibodies and testing dye conjugates and concentrations. Example images for vimentin are shown for normal colon and skin.

**M Vimentin (Cell Signaling 9855, clone D21H3)**

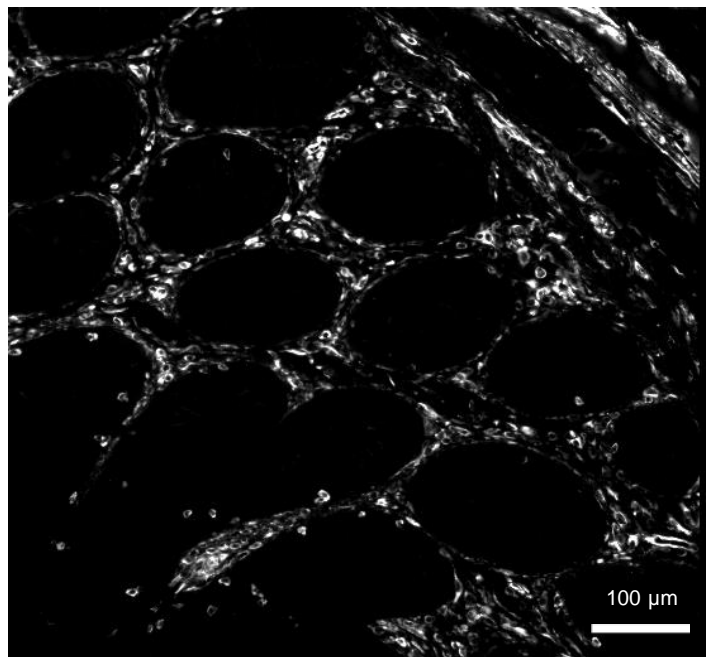

Normal colon – Commercial conjugate Alexa555, at 1.25 μg/mL

**Region of interest with Vimentin staining in multiplexed skin sample**

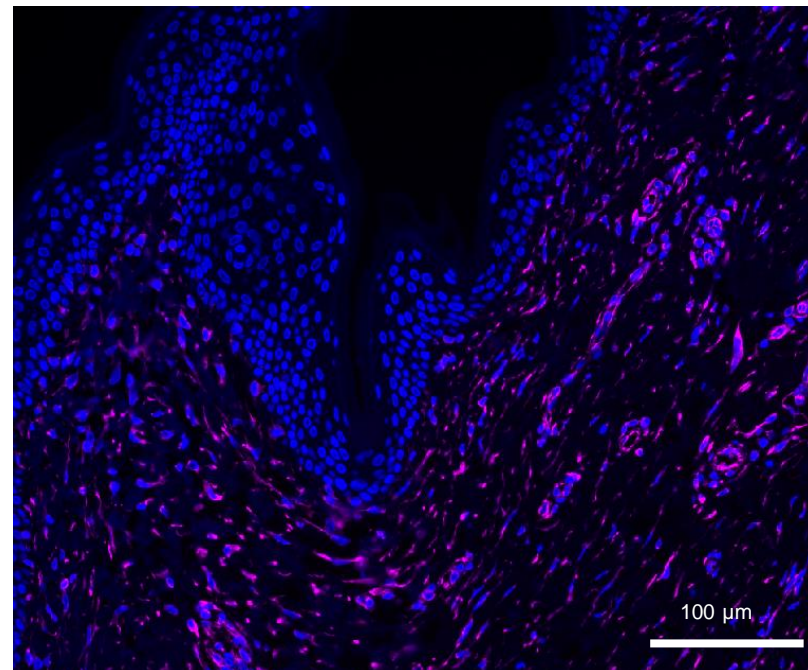

DAPI – Blue, Vimentin - Magenta

**Supplementary Figure 11** - Example images for fibronectin from earlier validation studies and in the multiplexed skin study. As described in methods, a multi-step process was utilized and is available on protocols.io [Cell DIVE™ Platform | Antibody Characterization for Multiplexing \(protocols.io\)](https://www.protocols.io). A multi-organ slide (Pantomics MTU391) containing tumor and corresponding uninvolved tissues as controls is used for screening antibodies and testing dye conjugates and concentrations. Example images for fibronectin are shown for normal pancreas and skin.

n **Fibronectin (Abcam ab206928, Clone F14)**

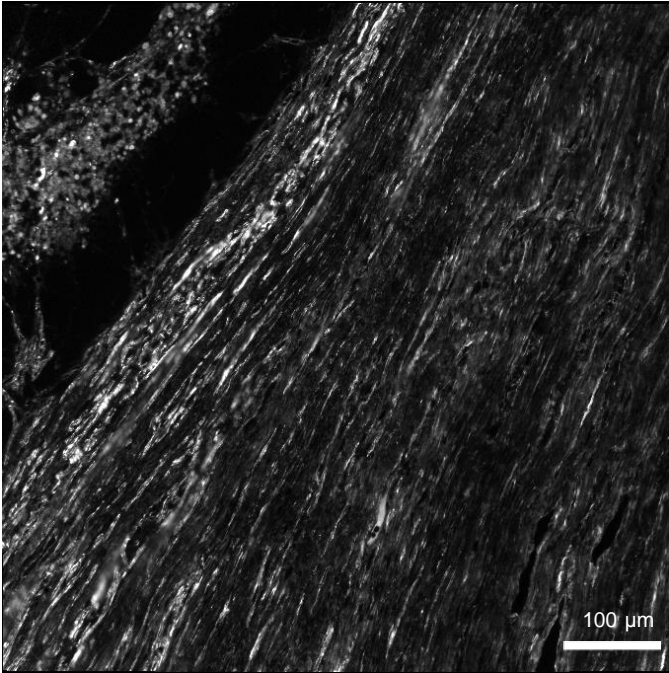

Normal pancreas, 3.4 D/P Cy5 at 5 μg/mL

**Region of interest with Fibronectin staining in multiplexed skin sample**

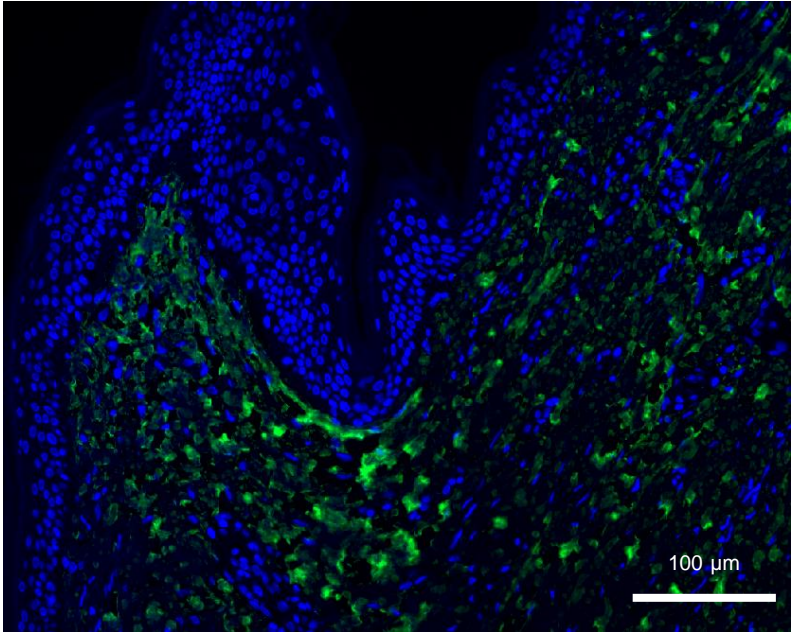

DAPI - Blue, Fibronectin - Green

**Supplementary Figure 11** - Example images for CD31 from earlier validation studies and in the multiplexed skin study. As described in methods, a multi-step process was utilized and is available on protocols.io [Cell DIVE™ Platform | Antibody Characterization for Multiplexing \(protocols.io\)](https://www.protocols.io). A multi-organ slide (Pantomics MTU391) containing tumor and corresponding uninjured tissues as controls is used for screening antibodies and testing dye conjugates and concentrations. Example images for CD31 are shown for normal colon and skin.

O **CD31 (Cell Signaling 3528BF, Clone 89C2)**

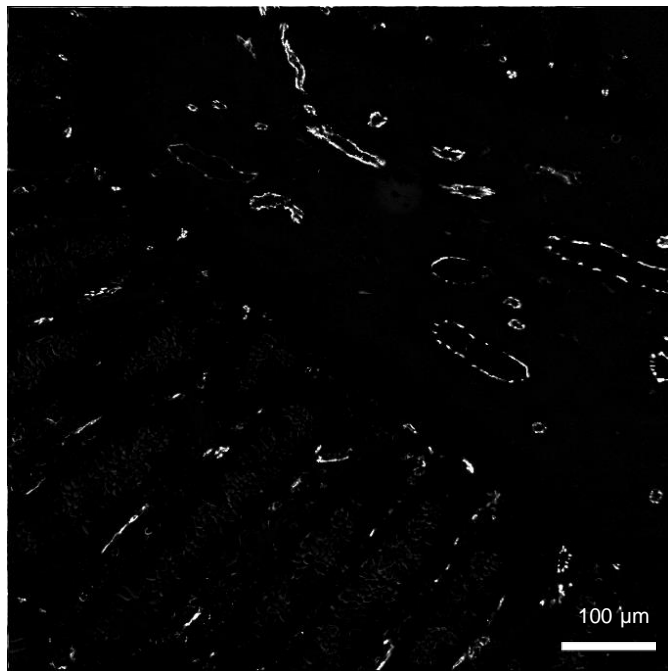

Normal colon, 3.4 D/P Cy3 at 5 μg/mL

**Region of interest with CD31 staining in multiplexed skin sample**

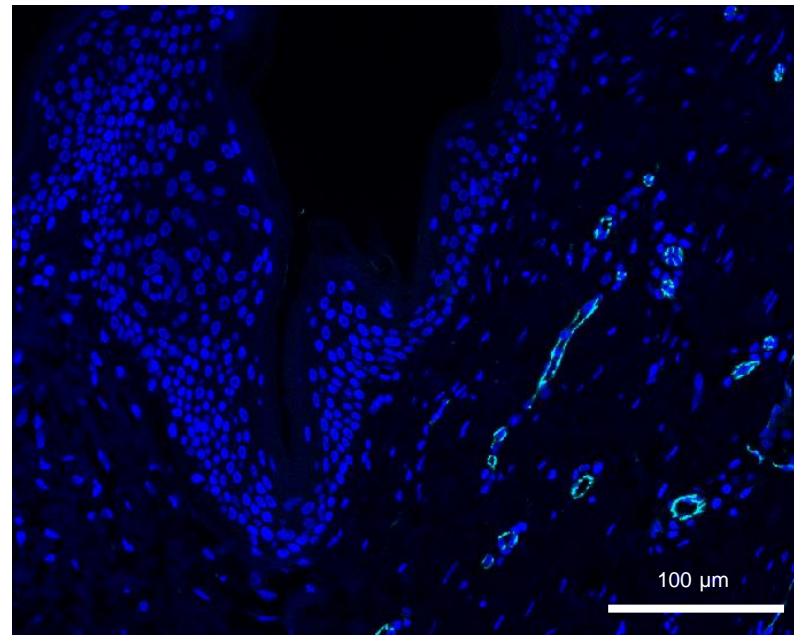

DAPI - Blue, CD31 - Cyan

**Supplementary Figure 11** - Example images for collagen IV from earlier validation studies and in the multiplexed skin study. As described in methods, a multi-step process was utilized and is available on protocols.io [Cell DIVE™ Platform | Antibody Characterization for Multiplexing \(protocols.io\)](https://www.protocols.io). A multi-organ slide (Pantomics MTU391) containing tumor and corresponding uninvolved tissues as controls is used for screening antibodies and testing dye conjugates and concentrations. Example images for collagen IV are shown for normal placenta and skin.

### Collagen IV (Millipore MAB3326, clone IV-4H12 )

p

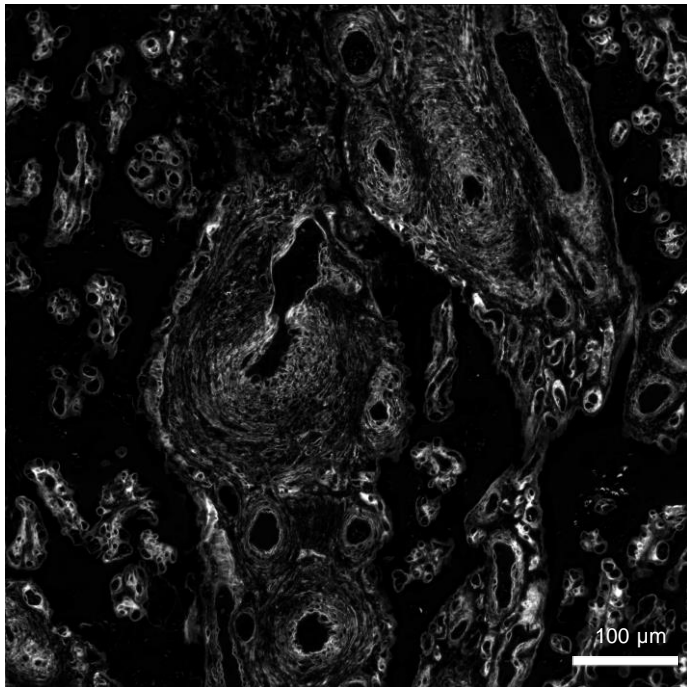

Normal placenta, 3.5 D/P Cy3 at 5 μg/mL

### Region of interest with Collagen IV staining in multiplexed skin sample

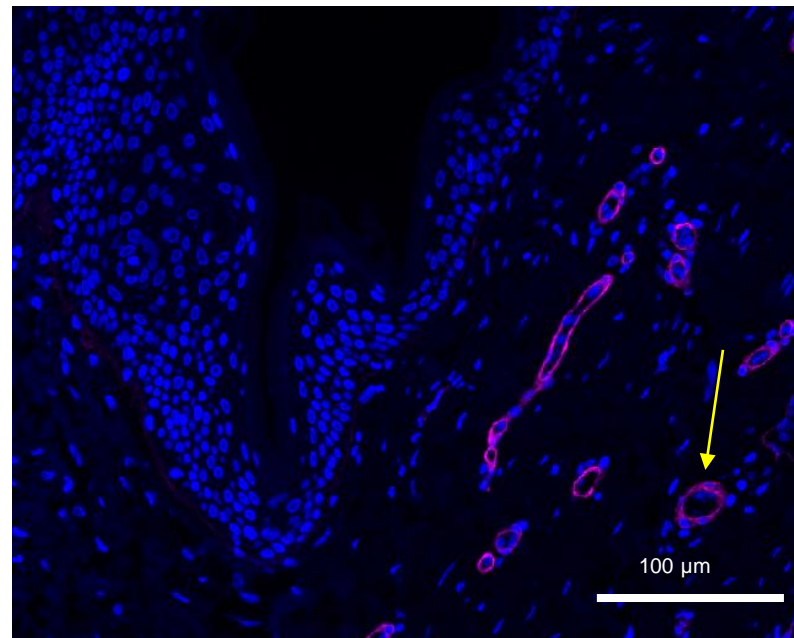

DAPI -Blue, Collagen IV - Magenta



**Supplementary Figure 11** - Example images for SMA from earlier validation studies and in the multiplexed skin study. As described in methods, a multi-step process was utilized and is available on protocols.io [Cell DIVE™ Platform | Antibody Characterization for Multiplexing \(protocols.io\)](https://www.protocols.io). A multi-organ slide (Pantomics MTU391) containing tumor and corresponding uninjured tissues as controls is used for screening antibodies and testing dye conjugates and concentrations. Example images for SMA are shown for prostate adenocarcinoma and skin.

q

### SMA (Sigma C6198, clone 1A4)

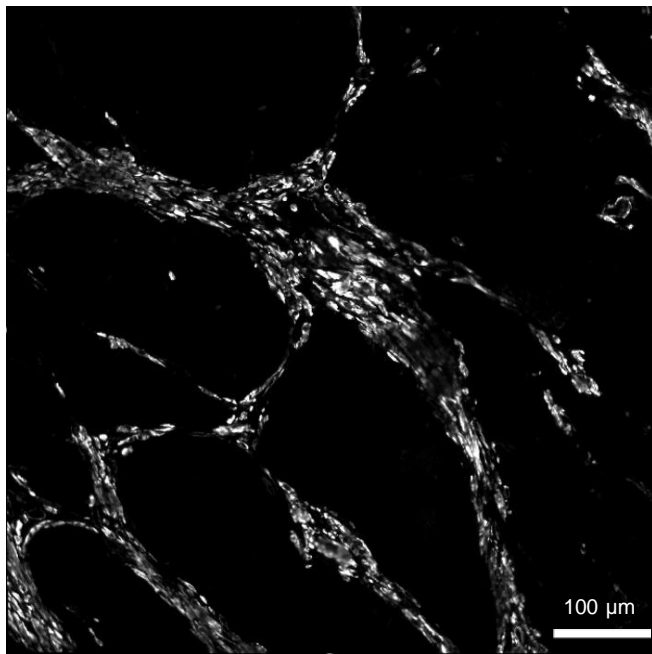

Prostate adenocarcinoma – Commercial conjugate  
Cy 3, 5 μg/mL

### Region of interest with SMA staining in multiplexed skin sample

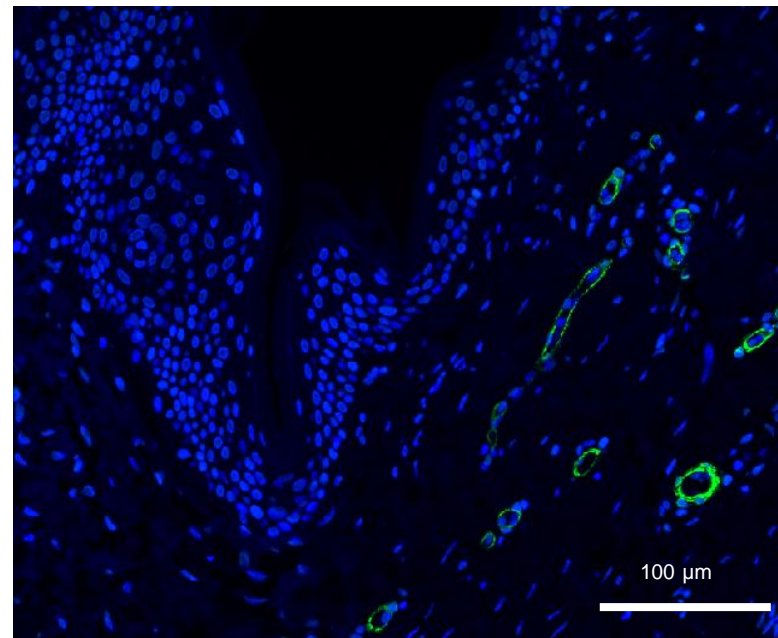

DAPI - Blue, SMA – Green

Supplementary Figure 11 – Shows non-specific staining for UCHL1 antibody. No further analysis was conducted with this data.

r

**UCHL1 (PGP 9.5) (Santa Cruz sc-58594, clone 13-C4 ) - higher non-specific staining in skin**

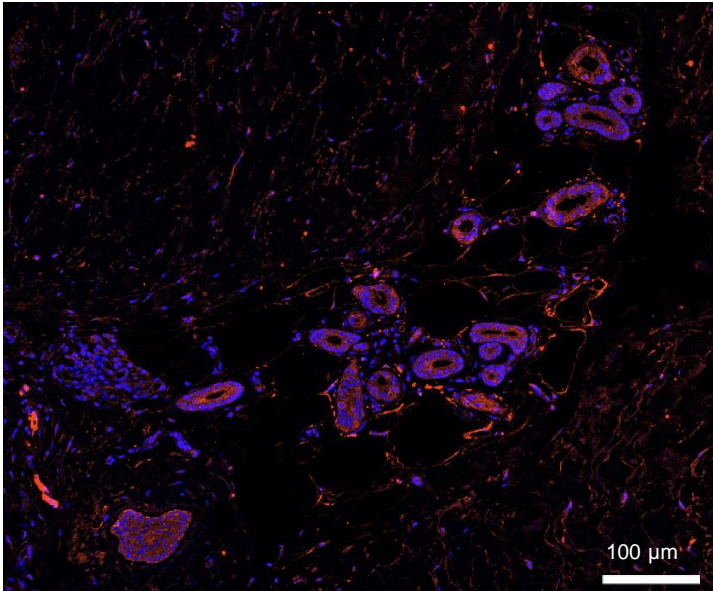

**Same region after thresholding background signal**

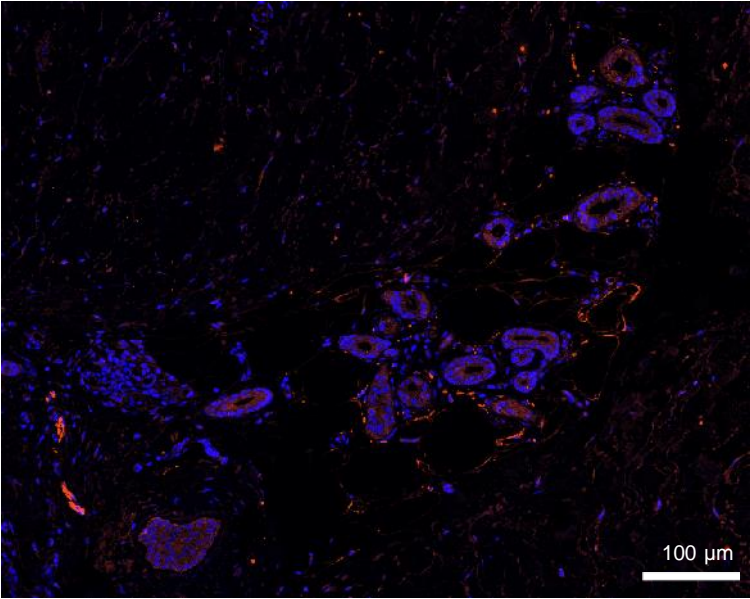

DAPI –Blue, UCHL1 - Red

**Supplementary Table 1** Details for donor, sample region, HuBMAP ID (to locate data associated with each sample), anatomical location, sample dimensions (before trimming and embedding), sun exposure effects (based on pathologist review), health status, age, sex, ethnicity of donor.

| Sample Region | Donor | HuBMAP ID       | Anatomical Location | Dimensions of original sample (cm) | Sun exposure damage in sample by H&E evaluation | Health Status of Donor             | Age (years) | Sex | Ethnicity |
|---------------|-------|-----------------|---------------------|------------------------------------|-------------------------------------------------|------------------------------------|-------------|-----|-----------|
| 9             | 1     | HBM372.JZTV.423 | L distal upper arm  | 4.3 x 2.0 x 0.8                    | Marked                                          | No major illness                   | 60          | M   | Caucasian |
| 8             | 2     | HBM892.LCXT.493 | R arm               | 3.7 x 2.4 x 0.5                    | Marked                                          | No major illness; HIV              | 57          | M   | Caucasian |
| 1             | 3     | HBM643.WWWB.264 | scalp               | 2.8 x 1.1 x 0.7                    | Marked                                          | Rheumatoid Arthritis; multiple SCC | 72          | M   | Caucasian |
| 10            | 4     | HBM262.JGDG.897 | L distal lower leg  | 3.0 x 1.3 x 0.7                    | Moderate                                        | No major illness                   | 53          | F   | Caucasian |
| 7             | 5     | HBM384.NNQH.676 | L lower arm         | 1.4 x 1.2 x 0.6                    | Marked                                          | No major illness                   | 69          | M   | Caucasian |
| 2             | 6     | HBM788.DGPQ.568 | L lower mid back    | 3.6 x 1.7 x 1.3                    | Mild                                            | No major illness                   | 52          | M   | Caucasian |
| 11            | 7     | HBM875.KTPB.893 | R upper arm         | 1.7 x 1.2 x 0.9                    | Mild                                            | No major illness                   | 41          | F   | Caucasian |
| 6             | 8     | HBM579.CXHK.929 | L back              | 4.2 x 1.5 x 0.8                    | Excluded                                        | No major illness                   | 35          | F   | Caucasian |
| 3             | 9     | HBM845.MJNG.266 | abdomen             | 2.8 x 1.2 x 0.7                    | Mild                                            | No major illness                   | 38          | F   | Unknown   |
| 12            | 10    | HBM636.ZSVF.869 | R flank             | 4.7 x 2.1 x 1.6                    | Excluded                                        | Systemic lupus erythematosus       | 32          | F   | Caucasian |
| 5             | 11    | HBM499.VJVR.265 | L abdomen           | 2.3 x 1.4 x 1.1                    | Mild                                            | No major illness                   | 33          | F   | Caucasian |
| 4             | 12    | HBM629.MBTF.679 | R superior abdomen  | 2.1 x 1.1 x 0.6                    | Mild                                            | No major illness                   | 48          | M   | Caucasian |

**Supplementary Table 2 a-c** Anatomical structure, cell types and biomarkers included in the skin ASCT+B table; **d** biomarkers used in this study. AE1 and CK26 were included as antibody cocktails (keratins are listed in parentheses and specific keratin for a particular cell type is underlined).

| Skin Layer | a. Anatomical structure   | b. Cell Types                     | c. Skin biomarkers - version 1.2 Skin ASCT+B Table                             | d. Biomarkers used in this study                                                                                                      |
|------------|---------------------------|-----------------------------------|--------------------------------------------------------------------------------|---------------------------------------------------------------------------------------------------------------------------------------|
| Epidermis  | <b>Stratum corneum</b>    | Keratinocytes (corneocyte)        | Involucrin, filaggrin                                                          | PCK26 ( <b>KRT1</b> , KRT5, KRT6, KRT8)                                                                                               |
|            | <b>Stratum granulosum</b> | Keratinocytes (Granular)          | KRT10                                                                          | AE1 ( <b>KRT10</b> , KRT14, KRT15, KRT16 and KRT19), <b>p53</b> , <b>MKI67</b> , <b>DDB2</b>                                          |
|            |                           | Langheran cells                   | CD1a, CD207, CIITA                                                             | -                                                                                                                                     |
|            | <b>Stratum spinosum</b>   | Prickle cells                     | KRT1, KRT10                                                                    | AE1 ( <b>KRT10</b> , KRT14, KRT15, KRT16 and KRT19), PCK26 ( <b>KRT1</b> , KRT5, KRT6, KRT8), <b>p53</b> , <b>MKI67</b> , <b>DDB2</b> |
|            |                           | Langheran cells                   | CD1a, CD207                                                                    | -                                                                                                                                     |
|            |                           | Merkel cells                      | KRT20, synaptophysin                                                           | -                                                                                                                                     |
|            | <b>Stratum Basale</b>     | Basal Keratinocytes               | KRT5, KRT14                                                                    | PCK26 (KRT1, <b>KRT5</b> , KRT6, KRT8), AE1 (KRT10, <b>KRT14</b> , KRT15, KRT16 and KRT19), <b>p53</b> , <b>MKI67</b> , <b>DDB2</b>   |
|            |                           | Langheran cells                   | CD1a, CD207                                                                    | -                                                                                                                                     |
|            |                           | Merkel cells                      | KRT20, synaptophysin                                                           | -                                                                                                                                     |
|            |                           | Melanocytes                       | SOX10, S100A2, melanA                                                          | -                                                                                                                                     |
| Dermis     | <b>Hair follicle</b>      | Keratinocyte stem cell            | KRT15, CD200, CD34                                                             | AE1 (KRT10, KRT14, <b>KRT15</b> , KRT16 and KRT19)                                                                                    |
|            | <b>Sebaceous gland</b>    | Sebocyte                          | MUC1, perilipin 2                                                              | -                                                                                                                                     |
|            | <b>Eccrine gland</b>      | Eccrine cell, myoepithelial cell  | KRT19, KRT26                                                                   | AE1 (KRT10, KRT14, KRT15, KRT16 and <b>KRT19</b> )                                                                                    |
|            | <b>Apocrine glands</b>    | Apocrine cell, myoepithelial cell | GCDFP-15, GATA3                                                                | -                                                                                                                                     |
|            |                           | Fibroblasts                       | Factor XIIIa (dermal dendrocytes with fibroblast cell lineage), vimentin, CD34 | <b>Vimentin</b>                                                                                                                       |
|            |                           | Dendritic cells                   | CD103, CD11b                                                                   | -                                                                                                                                     |
|            |                           | Macrophages                       | CD68, CD163                                                                    | <b>CD68</b>                                                                                                                           |
|            |                           | T helper                          | CD3D, CD4                                                                      | <b>CD3D, CD4</b>                                                                                                                      |
|            |                           | T killer                          | CD3D, CD8                                                                      | <b>CD3D, CD8</b>                                                                                                                      |
|            |                           | T reg                             | CD3D, CD4, FOXP3                                                               | <b>CD3D, CD4, FOXP3</b>                                                                                                               |
|            |                           | Natural killer cell               | CD3, CD56, CD16                                                                | -                                                                                                                                     |
|            |                           | B cells                           | CD19, CD79                                                                     | -                                                                                                                                     |
|            |                           | Neutrophils                       | MPO, p43                                                                       | -                                                                                                                                     |
|            |                           | Neuron                            | UCHL1 (PGP 9.5), CRCP                                                          | <b>UCHL1 (PGP 9.5)</b>                                                                                                                |
|            |                           | Endothelial cells                 | PECAM (CD31), ERG                                                              | <b>PECAM (CD31)</b>                                                                                                                   |
|            | Pericyte                  | SMA, PDGFRB, MCAM                 | <b>SMA</b>                                                                     |                                                                                                                                       |
|            | Lymphatic cells           | LYVE1                             | -                                                                              |                                                                                                                                       |

**Supplementary Table 3** Antibody, dye and staining information for each marker included in the study

| Target Name                                  | Cell type/structure  | Clone      | Vendor         | Catalog Number | Staining concentration (µg/mL) | Conjugate          | RRID        | Example validation images |
|----------------------------------------------|----------------------|------------|----------------|----------------|--------------------------------|--------------------|-------------|---------------------------|
| <b>Pan cytokeratin (1, 5, 6A, 6B, 6C, 8)</b> | Keratinocytes        | PCK-26     | Sigma          | C5992          | 2.5                            | Cy3                | AB_476824   | Supp. Figure 11a          |
| <b>Pan cytokeratin (10, 14, 15, 16, 19)</b>  | Keratinocytes        | AE1        | Thermo Fisher  | 14-9001        | 2.5                            | Cy3                | AB_1834477  | Supp. Figure 11b          |
| <b>Ki67</b>                                  | Cell proliferation   | SP6        | Abcam          | ab197547       | 5                              | Cy5                | AB_60162    | Supp. Figure 11c          |
| <b>p53</b>                                   | DNA damage           | DO-7       | Dako           | M7001          | 5                              | Cy5                | AB_2206626  | Supp. Figure 11d          |
| <b>DDB2</b>                                  | DNA repair           | EPR9811    | Abcam          | ab181136       | 6.2                            | Alexa647 secondary | AB_2889873  | Supp. Figure 11e          |
| <b>NaKATPase</b>                             | Cell membrane        | EP1845Y    | Abcam          | ab167390       | 5                              | Cy3                | AB_991679   | Supp. Figure 11f          |
| <b>pan Cadherin (1-13, 15-20, 22-24)</b>     |                      | polyclonal | NeoMarkers     | RB-9036        | 5                              | Cy5                | AB_149846   | Supp. Figure 11g          |
| <b>CD3</b>                                   | Lymphocytes          | F7.2.38    | Dako           | M7254          | 5                              | Cy5                | AB_2631163  | Supp. Figure 11h          |
| <b>CD4</b>                                   | T Helper             | EPR6855    | Abcam          | ab181724       | 5                              | Cy3B               | AB_2864377  | Supp. Figure 11i          |
| <b>FoxP3</b>                                 | T Reg                | 206D       | Biolegend      | 320114         | 10                             | Alexa647           | AB_439754   | Supp. Figure 11j          |
| <b>CD8</b>                                   | T killer             | C8/144B    | Dako           | M7103          | 5                              | Cy5                | AB_2075537  | Supp. Figure 11k          |
| <b>CD68</b>                                  | Macrophages          | KP1        | Thermo Fisher  | MS-397-PABX    | 2.5                            | Cy5                | AB_720551   | Supp. Figure 11l          |
| <b>Vimentin</b>                              | Fibroblasts          | D21H3      | Cell Signaling | 9855           | 1.25                           | Alexa647           | AB_10834530 | Supp. Figure 11m          |
| <b>Fibronectin</b>                           | Extracellular matrix | F14        | Abcam          | ab206928       | 5                              | Cy5                | AB_732380   | Supp. Figure 11n          |
| <b>CD31 (PECAM)</b>                          | Endothelial cells    | 89C2       | Cell Signaling | 3528BF         | 5                              | Cy3                | AB_2160882  | Supp. Figure 11o          |
| <b>Collagen IV</b>                           | Vessel wall          | IV-4H12    | Millipore      | MAB3326        | 5                              | Cy3                | AB_2229703  | Supp. Figure 11p          |
| <b>SMA</b>                                   | Pericytes            | 1A4        | Sigma          | C6198          | 2.5                            | Cy3                | AB_476856   | Supp. Figure 11q          |
| <b>UCLH1 (PGP 9.5)</b>                       | Neuron               | 13C4       | Santa cruz     | sc-58594       | 4                              | Cy3 secondary      | AB_793620   | Supp. Figure 11r          |

**Supplementary Table 4** T cell counts in 3D reconstructed volumes

| Region      | Anatomical region  | Sun exposure | Voxel count of embedded tissue sample | T cell count in 3D reconstructed volume (24 sections) | volume (um3) | T cell count/um3 | Estimated T Cell count/cm3 |
|-------------|--------------------|--------------|---------------------------------------|-------------------------------------------------------|--------------|------------------|----------------------------|
| 2           | L lower midback    | Mild         | 8111596                               | 1005                                                  | 40557980     | 0.000025         | 24,779,341                 |
| 3           | Abdomen            | Mild         | 9717796                               | 965                                                   | 48588980     | 0.000020         | 19,860,470                 |
| 4           | R superior abdomen | Mild         | 10559269                              | 2243                                                  | 52796345     | 0.000042         | 42,484,001                 |
| 5           | L abdomen          | Mild         | 8096305                               | 1513                                                  | 40481525     | 0.000037         | 37,375,074                 |
| 11          | R upper arm        | Mild         | 12380681                              | 1168                                                  | 61903405     | 0.000019         | 18,868,106                 |
| <b>Mean</b> |                    |              |                                       | <b>1379</b>                                           |              |                  | <b>28,673,399</b>          |
| <b>SD</b>   |                    |              |                                       | <b>529</b>                                            |              |                  | <b>10,670,369</b>          |
| 1           | Scalp              | Marked       | 5539694                               | 425                                                   | 27698470     | 0.000015         | 15,343,808                 |
| 7           | L lower arm        | Marked       | 5664437                               | 1329                                                  | 28322185     | 0.000047         | 46,924,346                 |
| 8           | R arm              | Marked       | 6966639                               | 1065                                                  | 34833195     | 0.000031         | 30,574,284                 |
| 9           | L distal upper arm | Marked       | 5454960                               | 1822                                                  | 27274800     | 0.000067         | 66,801,590                 |
| 10          | L distal lower leg | Moderate     | 5061144                               | 821                                                   | 25305720     | 0.000032         | 32,443,258                 |
| <b>Mean</b> |                    |              |                                       | <b>1092</b>                                           |              |                  | <b>38,417,457</b>          |
| <b>SD</b>   |                    |              |                                       | <b>526</b>                                            |              |                  | <b>19,414,079</b>          |

Supplementary Table 5 DICOM Header for the micro CT images

| Tag         | Attribute                   | Value                                                            | VR | Length  |
|-------------|-----------------------------|------------------------------------------------------------------|----|---------|
| (0008,0008) | ImageType                   | [2] ORIGINAL, PRIMARY                                            | CS | 16      |
| (0008,0016) | SOPClassUID                 | 1.2.840.10008.5.1.4.1.1.2                                        | UI | 26      |
| (0008,0018) | SOPInstanceUID              | 1.2.840.10008.5.1.4.1.1.2.2394280897527385622225493834451655930  | UI | 64      |
| (0008,0020) | StudyDate                   | 20200311                                                         | DA | 8       |
| (0008,0021) | SeriesDate                  | 20200311                                                         | DA | 8       |
| (0008,0022) | AcquisitionDate             | 20200311                                                         | DA | 8       |
| (0008,0030) | StudyTime                   | 132753.000000                                                    | TM | 14      |
| (0008,0031) | SeriesTime                  | 132753.000000                                                    | TM | 14      |
| (0008,0032) | AcquisitionTime             | 132753.000000                                                    | TM | 14      |
| (0008,0060) | Modality                    | CT                                                               | CS | 2       |
| (0008,0070) | Manufacturer                | GE                                                               | LO | 2       |
| (0008,1030) | StudyDescription            | IRB-191120023 90kV200uA333ms16um62min                            | LO | 38      |
| (0008,103e) | SeriesDescription           | IRB-191120023 90kV200uA333ms16um62min                            | LO | 38      |
| (0008,1070) | OperatorsName               | 212788497                                                        | PN | 10      |
| (0010,0020) | PatientID                   | 0                                                                | LO | 2       |
| (0018,0050) | SliceThickness              | 0.0160072                                                        | DS | 10      |
| (0018,0060) | KVP                         | 90                                                               | DS | 2       |
| (0018,1020) | SoftwareVersions            | DICONDE06                                                        | LO | 10      |
| (0018,1110) | DistanceSourceToDetector    | 811.425600                                                       | DS | 10      |
| (0018,1111) | DistanceSourceToPatient     | 64.943077                                                        | DS | 10      |
| (0018,1151) | XRayTubeCurrent             | 200                                                              | IS | 4       |
| (0018,1160) | FilterType                  | Unknown                                                          | SH | 8       |
| (0018,7006) | DetectorDescription         | 0.016007^0.016007                                                | LT | 18      |
| (0018,7020) | DetectorElementPhysicalSize | [2] 0.200000, 0.200000                                           | DS | 18      |
| (0020,000d) | StudyInstanceUID            | 1.2.840.10008.5.1.4.1.1.2.84882527690024139621408019339382376051 | UI | 64      |
| (0020,000e) | SeriesInstanceUID           | 1.2.840.10008.5.1.4.1.1.2.22967000708048043635986835612644175816 | UI | 64      |
| (0020,0010) | StudyID                     | 1                                                                | SH | 2       |
| (0020,0011) | SeriesNumber                | 1                                                                | IS | 2       |
| (0020,0012) | AcquisitionNumber           | 1                                                                | IS | 2       |
| (0020,0013) | InstanceNumber              | 784                                                              | IS | 4       |
| (0020,0032) | ImagePositionPatient        | [3] 0, 0, 12.5496096611023                                       | DS | 20      |
| (0020,0037) | ImageOrientationPatient     | [6] 1, 0, 0, 0, 1, 0                                             | DS | 12      |
| (0028,0002) | SamplesPerPixel             | 1                                                                | US | 2       |
| (0028,0004) | PhotometricInterpretation   | MONOCHROME2                                                      | CS | 12      |
| (0028,0010) | Rows                        | 1066                                                             | US | 2       |
| (0028,0011) | Columns                     | 1999                                                             | US | 2       |
| (0028,0030) | PixelSpacing                | [2] 0.016007, 0.016007                                           | DS | 18      |
| (0028,0100) | BitsAllocated               | 16                                                               | US | 2       |
| (0028,0101) | BitsStored                  | 16                                                               | US | 2       |
| (0028,0102) | HighBit                     | 15                                                               | US | 2       |
| (0028,0103) | PixelRepresentation         | 1                                                                | US | 2       |
| (7fe0,0010) | PixelData                   | 2a64                                                             | OW | 4261868 |
