# Supplementary material for: 3D reconstruction of skin and spatial mapping of immune cell density, vascular distance and effects of sun exposure and aging
Source: PubMed Central journal article supplement (PMC10356782; doi:10.1038/s42003-023-04991-z), 2023-07-19
Supplement: 42003_2023_4991_MOESM3_ESM.pdf [file 42003_2023_4991_MOESM3_ESM.pdf]

## Description of Additional Supplementary Files

**File name:** Supplementary Data 1

**Description:** Source data for Figures 4C-E; Figures 5C-D; Figure 6 A-C. Supplementary Figure 8A-C.
